# Supplementary material for: Association between somatic symptom burden and health-related quality of life in people with chronic low back pain
Source: PLoS One. 2018 Feb 20;13(2):e0193208. doi: 10.1371/journal.pone.0193208 (PMC5819824; doi:10.1371/journal.pone.0193208)
Supplement: S1 File — Data set for this analysis. (CSV) [file pone.0193208.s001.csv]

EQ5D_score	SSS8	sss8_e	BMI	phq2	reg_activity	BMI_cat	married	college	reg_job	N_comorbid	Age	Height	Weight	Sex	Smoking
1	0	1	17.7154195	0	1	0	0	1	0	0	49	168	50	Female	0
1	0	1	18.73048907	0	0	0	0	1	0	0	20	155	45	Male	0
1	0	1	20.72704082	2	0	0	1	0	0	0	64	168	58.5	Male	0
1	0	1	24.39482079	2	0	0	1	0	0	0	41	146	52	Female	1
1	3	1	22.49134948	0	0	0	0	1	1	0	30	170	65	Male	0
0.768	1	1	21.2183172	0	1	0	1	0	0	3	62	161	55	Male	1
1	3	1	26.5625	0	0	1	1	0	1	1	45	160	68	Male	1
1	1	1	25.0995016	1	0	1	0	0	1	0	36	167	70	Male	1
0.654	3	1	21.484375	1	0	0	0	0	0	0	57	160	55	Male	1
0.711	0	1	20.13477975	0	0	0	1	0	1	1	41	156	49	Female	1
1	0	1	20.76124568	0	0	0	0	0	0	0	29	170	60	Male	0
1	1	1	20.703125	0	0	0	1	1	0	0	37	160	53	Female	0
1	2	1	23.87511478	0	1	0	0	0	0	0	44	165	65	Male	1
1	3	1	20.76124568	0	0	0	1	0	0	0	63	170	60	Male	0
1	1	1	20.54569362	0	0	0	0	1	1	0	41	156	50	Female	0
1	0	1	24.97398543	0	0	0	1	0	0	1	32	155	60	Female	0
1	3	1	27.46666667	1	0	1	1	0	0	3	50	150	61.8	Female	0
1	3	1	24.22145329	0	0	0	1	1	1	0	44	170	70	Male	0
0.661	2	1	18.78128646	1	0	0	0	0	0	1	37	163	49.9	Male	0
1	0	1	22.65625	0	0	0	1	1	0	0	57	160	58	Female	0
1	0	1	19.48096886	0	0	0	1	1	0	0	23	170	56.3	Female	0
1	0	1	21.4532872	0	0	0	0	1	1	0	30	170	62	Male	1
0.693	2	1	21.93634741	0	0	0	1	0	0	3	63	164	59	Female	0
0.705	3	1	22.58270917	1	1	0	0	0	0	0	39	163	60	Male	0
1	2	1	22.2136785	0	0	0	1	0	0	0	50	153	52	Female	0
0.768	2	1	19.47340663	0	0	0	1	1	0	1	38	157	48	Female	0
1	0	1	18.73048907	0	0	0	0	0	0	0	21	155	45	Female	0
1	0	1	19.81405274	1	0	0	0	0	0	0	62	162	52	Female	0
1	2	1	21.73650525	2	1	0	1	0	1	0	50	182	72	Male	0
0.804	1	1	24.4646016	0	1	0	0	1	0	0	23	163	65	Male	0
1	2	1	19.36983471	2	0	0	0	0	0	0	37	176	60	Male	1
1	2	1	22.83950617	0	0	0	1	0	1	0	41	180	74	Male	1
0.649	3	1	28.65013774	0	0	1	1	1	0	2	62	165	78	Female	0
0.724	3	1	22.54657648	0	0	0	0	1	0	1	55	159	57	Female	1
0.705	3	1	17.30612245	0	1	0	0	1	1	0	34	175	53	Male	0
1	1	1	33.26214068	2	0	2	1	0	0	0	52	169	95	Male	0
0.419	3	1	19.59183674	1	0	0	1	0	1	0	52	175	60	Male	1
1	3	1	22.94408888	0	1	0	1	1	1	1	45	182	76	Male	0
0.768	0	1	22.32142857	2	0	0	1	0	0	0	55	168	63	Female	0
1	2	1	25.51020408	1	0	1	0	1	1	0	36	168	72	Male	0
1	1	1	29.32098765	0	1	1	0	0	0	2	30	180	95	Male	0
1	2	1	20.10916403	0	0	0	1	1	1	0	52	177	63	Male	1
1	1	1	22.49134948	0	1	0	1	1	1	0	50	170	65	Male	0
1	0	1	21.71806609	2	0	0	1	1	1	0	39	173	65	Male	0
1	2	1	22.95908766	2	0	0	0	1	0	0	34	163	61	Male	0
1	3	1	26.57312925	0	1	1	1	0	1	0	43	168	75	Male	0
0.768	3	1	40.5624662	0	0	2	0	1	1	0	39	172	120	Male	0
0.768	1	1	24.22145329	0	0	0	1	0	1	0	38	170	70	Male	0
1	2	1	26.34649403	0	0	1	1	0	0	0	38	163	70	Male	1
0.774	0	1	37.18226068	0	0	2	0	0	1	0	28	172	110	Male	0
1	2	1	24.33747972	0	0	0	1	1	1	0	51	172	72	Male	0
0.768	2	1	21.09375	1	0	0	0	1	0	0	62	160	54	Male	0
1	0	1	22.32142857	2	1	0	0	1	0	0	58	168	63	Male	0
1	2	1	18.359375	0	0	0	1	1	0	0	36	160	47	Female	0
0.768	3	1	17.57706869	0	0	0	1	1	0	0	43	172	52	Female	1
1	0	1	15.6226185	2	0	0	0	1	1	0	37	162	41	Female	1
1	0	1	18.81892431	0	0	0	0	0	0	0	23	163	50	Female	0
0.768	3	1	35.73749188	0	0	2	0	0	1	0	31	171	104.5	Male	0
0.693	0	1	16.9550173	0	1	0	0	0	0	0	26	170	49	Male	0
1	0	1	18.21493625	0	0	0	1	1	1	1	49	183	61	Male	0
1	0	1	18.25631872	0	0	0	1	1	0	0	33	157	45	Female	0
1	0	1	19.03114187	0	0	0	1	1	0	0	41	170	55	Male	1
0.786	2	1	18.90203813	2	0	0	0	0	0	0	27	156	46	Female	1
1	1	1	28.72737719	0	0	1	0	0	1	0	51	177	90	Male	0
1	2	1	19.46740129	0	0	0	1	1	1	0	55	165	53	Female	1
0.768	2	1	24.25127831	0	1	0	1	0	1	0	38	185	83	Male	0
1	2	1	32.03895938	2	0	2	0	0	0	0	23	153	75	Female	0
1	3	1	23.22543185	0	0	0	1	0	1	0	46	166	64	Male	1
1	0	1	23.56663223	0	0	0	0	0	0	0	32	176	73	Male	0
1	2	1	26.21882086	0	1	1	0	0	1	1	45	168	74	Male	0
1	0	1	26.34649403	2	0	1	0	0	1	0	42	163	70	Male	1
1	3	1	20.2020202	1	0	0	1	0	1	0	37	165	55	Female	1
1	0	1	25.61728395	0	0	1	1	1	1	0	51	180	83	Male	0
1	3	1	20.07733492	0	0	0	1	1	0	0	48	164	54	Female	0
1	3	1	25.06574622	0	0	1	1	1	0	0	47	156	61	Female	0
1	3	1	22.34351559	0	0	0	1	1	1	2	40	177	70	Male	0
1	0	1	22.89281998	0	0	0	0	1	0	0	39	155	55	Female	0
0.774	0	1	24.48979592	0	0	0	1	0	1	0	40	175	75	Male	0
0.768	3	1	24.87771968	0	0	0	1	0	0	1	58	154	59	Female	0
1	0	1	26.03837899	0	0	1	1	0	1	0	35	178	82.5	Male	0
1	2	1	21.2585034	0	0	0	1	0	0	2	57	168	60	Male	1
1	2	1	20.57142857	0	0	0	1	0	1	0	44	175	63	Male	1
1	3	1	21.09619052	0	0	0	1	0	0	0	64	157	52	Female	0
1	0	1	21.79930796	0	0	0	1	0	1	0	60	170	63	Male	1
1	1	1	21.90311419	2	0	0	1	0	1	0	54	170	63.3	Male	1
1	1	1	24.91349481	2	0	0	1	0	1	0	46	170	72	Male	0
0.768	0	1	19.14672216	0	0	0	1	0	0	0	55	155	46	Female	1
1	2	1	18.77834467	0	0	0	0	0	0	0	32	168	53	Male	1
1	1	1	24.62296091	0	0	0	1	1	0	0	41	171	72	Male	1
0.649	0	1	26.67487432	0	0	1	0	0	0	0	43	171	78	Male	0
1	0	1	26.12244898	0	0	1	1	0	1	0	50	175	80	Male	0
0.705	2	1	23.922423	2	0	0	1	0	1	1	58	153	56	Female	0
1	2	1	24.21229339	0	1	0	1	0	0	0	61	176	75	Male	1
0.774	3	1	28.71972318	0	0	1	1	0	1	0	51	170	83	Male	0
0.768	3	1	21.23057202	1	0	0	1	0	0	0	59	158	53	Female	1
1	0	1	26.30361892	0	0	1	1	0	1	0	38	186	91	Male	0
1	1	1	21.41094499	0	0	0	1	1	0	0	38	166	59	Female	0
1	1	1	21.79930796	0	0	0	1	1	1	0	44	170	63	Male	0
1	3	1	19.55555556	0	1	0	1	0	1	0	35	150	44	Female	0
1	2	1	22.49134948	1	0	0	1	0	0	0	46	170	65	Male	1
1	0	1	23.05175491	2	0	0	0	1	1	0	41	164	62	Male	0
1	0	1	21.484375	2	1	0	0	0	1	1	49	160	55	Male	0
1	2	1	31.24876389	2	0	2	1	0	1	0	40	159	79	Female	0
0.705	2	1	20.54419284	2	1	0	0	0	1	0	26	148	45	Female	0
1	2	1	19.81784449	0	0	0	0	0	1	0	50	154	47	Female	0
1	3	1	21.33821064	0	0	0	1	1	0	1	51	162	56	Female	0
1	0	1	20.57613169	0	0	0	1	0	0	0	49	162	54	Female	0
1	0	1	20.703125	0	0	0	1	1	0	0	55	160	53	Female	0
1	2	1	21.79930796	0	0	0	1	1	1	0	41	170	63	Male	0
1	0	1	24.05693475	0	0	0	0	1	1	0	36	173	72	Male	0
1	0	1	19.15119182	1	0	0	0	1	1	0	42	171	56	Male	0
0.1	0	1	16.23309053	2	0	0	1	1	0	0	35	155	39	Female	1
0.705	2	1	20.41522491	0	0	0	1	1	0	0	57	170	59	Male	0
0.786	2	1	18.87066338	0	0	0	1	0	0	0	31	166	52	Female	0
1	2	1	24	2	0	0	1	0	0	0	45	150	54	Female	0
1	3	1	25.92592593	2	0	1	0	1	1	0	28	180	84	Male	0
0.705	2	1	20.01549587	0	0	0	0	1	0	0	31	176	62	Male	0
0.768	3	1	19.57168128	2	0	0	1	1	0	0	35	163	52	Female	0
1	2	1	21.87242282	0	1	0	0	1	1	0	29	167	61	Male	0
1	0	1	21.21687995	1	0	0	1	1	1	0	37	173	63.5	Male	0
1	0	1	20.00457247	0	0	0	0	0	0	0	52	162	52.5	Male	1
1	3	1	18.92915089	2	1	0	0	0	1	0	23	172	56	Male	1
1	3	1	20.56932966	0	0	0	0	0	1	0	40	165	56	Male	1
0.786	1	1	20.54569362	2	0	0	0	1	1	0	54	156	50	Female	0
0.693	3	1	28.515625	0	0	1	1	0	0	1	56	160	73	Male	0
1	0	1	19.6311176	0	0	0	1	0	0	1	64	148	43	Female	0
1	0	1	25.88057064	0	1	1	1	1	1	0	49	178	82	Male	1
1	1	1	25.91068435	0	0	1	0	1	0	0	44	162	68	Female	0
1	0	1	19.3221846	0	0	0	1	0	1	0	58	171	56.5	Male	0
1	2	1	25.54563492	0	1	1	1	0	1	0	39	168	72.1	Male	0
1	1	1	26.67487432	0	0	1	0	1	1	0	40	171	78	Male	1
1	3	1	25.72755521	0	0	1	1	1	1	2	36	173	77	Male	0
0.768	2	1	26.79493802	1	0	1	0	1	0	0	43	176	83	Male	1
1	2	1	20.703125	1	0	0	1	1	0	0	51	160	53	Female	0
1	1	1	23.67125363	0	0	0	0	1	1	0	28	178	75	Male	0
1	2	1	22.10028959	1	0	0	0	1	0	2	41	162	58	Male	1
0.768	3	1	19.72386588	2	0	0	1	1	0	1	45	156	48	Female	0
1	0	1	21.10726644	0	0	0	0	0	0	0	47	170	61	Male	1
1	2	1	19.09481126	0	0	0	1	1	1	1	28	178	60.5	Male	0
1	3	1	20.76124568	0	0	0	1	0	1	1	42	170	60	Male	0
0.786	0	1	24.67550027	0	0	0	0	0	0	1	47	172	73	Male	0
1	2	1	26.47210744	0	0	1	1	1	1	1	52	176	82	Male	0
1	0	1	19.37716263	0	0	0	1	0	1	0	37	170	56	Male	0
1	2	1	18.06972789	0	0	0	1	0	0	0	54	168	51	Male	1
1	0	1	19.59183674	0	0	0	1	1	1	0	56	175	60	Male	0
-0.111	1	1	23.51020408	0	0	0	1	0	1	0	43	175	72	Male	0
1	0	1	23.14049587	0	0	0	1	0	1	1	53	165	63	Male	0
1	3	1	23.45856238	0	0	0	0	0	0	0	62	169	67	Male	1
1	0	1	23.62444749	1	0	0	1	0	0	0	36	162	62	Female	1
0.693	0	1	27.54820937	0	0	1	1	1	1	1	26	165	75	Female	0
1	0	1	25.72755521	0	0	1	1	1	1	0	49	173	77	Male	0
1	0	1	20.19509221	1	0	0	1	1	0	3	62	162	53	Male	1
1	0	1	25.08503401	1	1	1	1	1	1	0	30	168	70.8	Male	0
1	0	1	23.828125	2	0	0	0	1	0	4	58	160	61	Female	0
1	1	1	21.30394858	0	0	0	0	1	1	2	27	165	58	Male	1
1	1	1	19.77769867	0	0	0	1	0	0	0	25	159	50	Female	0
1	1	1	21.484375	0	0	0	0	0	0	0	28	160	55	Female	0
1	0	1	20.66115703	0	0	0	1	1	0	0	39	154	49	Female	0
1	0	1	19.8791026	0	1	0	1	1	0	1	53	157	49	Female	0
1	1	1	20.504934	0	0	0	0	1	0	0	24	153	48	Female	0
1	1	1	20.13624901	0	0	0	1	1	0	0	35	163	53.5	Female	0
0.786	3	1	18.90203813	2	0	0	0	0	0	0	27	156	46	Female	1
1	0	1	20.76124568	0	1	0	1	0	0	0	56	170	60	Male	1
1	3	1	18.68512111	0	0	0	1	1	1	0	29	170	54	Female	0
1	1	1	22.39578959	0	0	0	0	0	1	0	37	189	80	Male	0
1	0	1	20.47826661	0	0	0	0	0	0	0	49	174	62	Male	1
1	0	1	19.28374656	0	0	0	0	0	0	0	52	165	52.5	Female	1
1	0	1	25.23634033	0	0	1	1	0	0	0	32	158	63	Female	0
1	2	1	23.58832922	0	0	0	1	1	0	0	52	166	65	Female	0
1	2	1	23.70242215	0	1	0	0	1	1	0	39	170	68.5	Male	0
0.768	2	1	23.38868656	0	0	0	0	1	1	0	39	173	70	Male	0
1	0	1	17.64705882	0	1	0	0	0	0	0	20	170	51	Male	0
1	1	1	19.58647113	0	0	0	0	1	0	0	25	174	59.3	Male	1
1	3	1	22.49134948	0	0	0	1	1	1	0	44	170	65	Male	0
1	3	1	20.2020202	0	0	0	1	1	0	0	44	165	55	Female	0
1	0	1	18.48041457	2	0	0	1	0	0	0	45	162	48.5	Female	1
1	3	1	23.93898978	1	0	0	0	1	1	0	31	171	70	Male	0
0.786	1	1	22.01814144	1	1	0	0	0	0	0	46	163	58.5	Male	0
1	2	1	28.08163265	0	0	1	1	1	1	0	50	175	86	Male	1
1	0	1	23.33546615	0	1	0	1	1	1	0	53	163	62	Male	0
1	2	1	20.95717116	0	0	0	0	1	1	0	40	162	55	Female	0
1	2	1	23.72904273	0	1	0	1	1	1	0	44	172	70.2	Male	1
0.768	2	1	22.25097841	1	0	0	0	0	0	0	48	178	70.5	Male	1
1	3	1	26.2345679	2	0	1	1	0	1	0	49	180	85	Male	0
1	2	1	16.40625	1	0	0	1	0	0	0	28	160	42	Male	1
1	1	1	21.23057202	0	0	0	0	0	0	0	21	158	53	Female	0
1	2	1	19.15158479	2	0	0	1	0	1	0	35	177	60	Male	1
0.786	3	1	20.90419501	1	0	0	0	0	1	0	48	168	59	Male	0
1	3	1	26.25958475	0	0	1	1	1	1	1	37	169	75	Male	1
1	0	1	21.484375	1	0	0	1	0	0	0	51	160	55	Female	0
1	0	1	21.61281179	0	0	0	1	1	1	0	56	168	61	Male	0
1	1	1	26.98600101	0	0	1	1	0	0	1	34	154	64	Female	0
1	1	1	23.14255983	0	0	0	1	1	0	0	39	155	55.6	Female	0
1	3	1	20.06095444	1	0	0	0	1	0	0	44	161	52	Female	0
1	3	1	22.49124502	0	0	0	1	1	1	0	39	182	74.5	Male	0
0.654	3	1	19.72318339	0	0	0	1	0	1	0	50	170	57	Male	0
0.768	2	1	29.86495845	0	0	1	0	0	0	0	48	152	69	Female	0
1	1	1	20.2812331	1	0	0	0	0	0	0	48	172	60	Male	1
1	0	1	25.92812789	0	0	1	0	1	0	0	33	174	78.5	Male	0
1	2	1	24.65590962	0	0	0	0	0	0	0	48	179	79	Male	0
1	3	1	25.46938776	1	0	1	0	1	1	0	29	175	78	Male	1
1	1	1	18.36348906	0	0	0	1	1	1	0	45	161	47.6	Male	0
1	0	1	22.34351559	0	0	0	0	1	1	0	35	177	70	Male	0
1	1	1	20.25888343	0	0	0	0	0	0	0	34	167	56.5	Male	0
1	1	1	22.30814991	0	0	0	0	0	0	0	42	164	60	Male	1
1	3	1	25.40281608	0	0	1	1	0	0	0	39	166	70	Female	0
1	1	1	29.05328798	0	0	1	1	1	1	0	62	168	82	Male	0
1	3	1	23.03004535	0	1	0	1	0	1	1	59	168	65	Male	1
1	2	1	27.01685989	1	0	1	1	1	0	0	49	171	79	Male	0
1	2	1	20.08163265	2	0	0	0	0	0	0	43	175	61.5	Male	1
1	3	1	23.40521694	0	1	0	1	0	1	0	43	176	72.5	Male	0
1	3	1	25.61728395	1	0	1	1	1	1	0	55	180	83	Male	0
1	0	1	20.71569381	0	0	0	1	0	0	0	37	173	62	Male	1
1	1	1	22.32142857	0	0	0	0	0	0	0	60	168	63	Male	0
1	2	1	19.97918835	0	0	0	1	0	0	0	46	155	48	Female	0
1	2	1	22.08816113	0	0	0	1	1	1	0	45	177	69.2	Male	1
0.768	2	1	20.51913409	1	0	0	1	0	0	0	50	171	60	Male	1
1	1	1	19.39618823	0	0	0	1	0	0	0	39	154	46	Female	1
1	2	1	22.03172569	0	0	0	1	1	0	0	60	158	55	Female	0
1	0	1	20.0617284	0	0	0	1	1	1	0	34	180	65	Male	0
1	1	1	22.10884354	0	1	0	0	0	0	0	51	168	62.4	Male	1
1	0	1	20.89795918	0	1	0	1	1	0	0	56	175	64	Male	1
1	3	1	19.59183674	0	1	0	0	1	1	1	25	175	60	Male	0
1	2	1	20.93212013	0	0	0	1	0	1	0	45	153	49	Female	0
0.768	2	1	18.81892431	0	0	0	1	0	0	0	64	163	50	Female	0
1	3	1	20.9572742	0	0	0	1	1	1	0	34	172	62	Male	0
1	0	1	27.6816609	0	0	1	0	1	0	0	45	170	80	Male	0
0.768	3	1	20.51508648	0	0	0	0	0	1	0	59	178	65	Male	1
1	1	1	21.77755334	1	0	0	1	1	1	0	50	178	69	Male	0
1	2	1	20.19557823	1	0	0	1	1	1	1	49	168	57	Male	1
1	2	1	24.2568371	0	0	0	1	0	0	0	31	145	51	Female	0
1	1	1	24.65279085	0	0	0	1	0	1	0	63	163	65.5	Male	1
1	0	1	19.00390835	0	1	0	0	0	1	0	30	167	53	Female	1
1	0	1	18.19400555	0	0	0	0	0	0	0	40	177	57	Male	0
1	2	1	20.52892163	0	1	0	1	0	1	0	42	182	68	Male	1
0.786	0	1	23.56663223	1	0	0	1	1	1	0	47	176	73	Male	1
1	0	1	21.79930796	0	0	0	1	1	1	0	43	170	63	Male	0
1	0	1	22.47120876	0	0	0	0	1	1	0	43	179	72	Male	1
1	0	1	19.03114187	0	1	0	0	1	0	0	42	170	55	Male	0
1	0	1	20.34279778	0	0	0	0	0	1	1	41	152	47	Female	0
1	0	1	26.47058824	0	0	1	1	1	0	0	54	170	76.5	Male	0
1	1	1	22.60026299	1	0	0	0	0	0	0	24	156	55	Female	0
1	2	1	26.29848784	0	0	1	1	0	0	1	24	156	64	Female	0
1	1	1	23.183391	0	0	0	1	0	1	0	56	170	67	Male	1
1	1	1	19.03114187	0	0	0	1	0	0	0	56	170	55	Male	0
1	0	1	17.9203913	0	0	0	1	0	0	0	54	154	42.5	Female	1
1	2	1	19.26717144	0	0	0	1	0	1	0	34	172	57	Male	1
1	0	1	16.00365798	0	0	0	1	0	0	0	28	162	42	Female	1
1	0	1	22.49134948	0	1	0	0	0	0	0	21	170	65	Male	1
1	0	1	20.63963582	0	0	0	1	0	0	0	24	161	53.5	Female	0
1	0	1	23.88946281	0	1	0	1	1	1	0	61	176	74	Male	0
1	3	1	21.30400317	0	0	0	1	0	1	0	54	174	64.5	Male	0
1	1	1	22.49134948	0	1	0	1	0	0	0	43	170	65	Male	0
1	2	1	16.61326688	0	0	0	1	0	1	0	44	159	42	Female	1
0.693	0	1	28.65013774	0	0	1	1	0	0	0	52	165	78	Male	1
0.656	0	1	27.21730295	2	0	1	1	0	0	0	28	166	75	Female	1
1	0	1	27.77427093	1	0	1	1	0	1	0	56	178	88	Male	0
1	1	1	19.36247266	0	0	0	1	1	0	0	59	167	54	Male	0
1	0	1	22.5981405	0	0	0	1	1	1	0	47	176	70	Male	1
0.768	3	1	25.25951557	0	0	1	1	1	1	0	37	170	73	Male	1
0.786	2	1	27.6816609	2	0	1	0	1	1	0	30	170	80	Male	0
0.786	3	1	21.36752137	1	0	0	1	0	0	0	33	156	52	Female	0
1	1	1	29.40759637	1	0	1	1	1	1	0	34	168	83	Male	1
0.705	2	1	23.30905307	2	0	0	1	0	0	1	61	155	56	Female	0
0.768	3	1	25.10387812	1	1	1	1	0	1	4	59	152	58	Female	0
1	0	1	25.21735858	2	0	1	1	0	1	0	44	163	67	Male	1
0.693	2	1	24.1671624	1	0	0	1	0	0	4	64	164	65	Male	1
1	3	1	20.57613169	0	0	0	1	1	0	1	61	162	54	Female	0
1	3	1	26.54320988	0	0	1	1	1	1	0	49	180	86	Male	0
0.768	3	1	28.32658037	0	0	1	1	1	1	1	60	167	79	Male	0
1	1	1	19.45129917	0	0	0	1	1	0	0	56	166	53.6	Female	0
1	3	1	19.140625	2	0	0	1	0	0	0	36	160	49	Female	0
1	0	1	22.22906193	0	0	0	1	1	1	0	36	171	65	Male	0
1	3	1	20.83044983	0	0	0	1	1	1	0	49	170	60.2	Male	1
1	0	1	19.00390835	0	0	0	1	0	0	0	35	167	53	Female	0
1	0	1	18.54912764	2	0	0	0	1	1	0	37	165	50.5	Female	0
1	2	1	18.82711104	0	0	0	0	0	1	0	23	158	47	Female	1
0.768	3	1	22.03856749	1	0	0	0	1	0	0	56	165	60	Female	0
1	3	1	19.14672216	0	1	0	0	0	1	1	62	155	46	Female	0
0.768	2	1	22.265625	0	0	0	1	0	0	2	58	160	57	Female	0
1	0	1	23.046875	0	0	0	0	0	0	0	43	160	59	Female	1
0.768	2	1	24.48979592	1	0	0	1	0	1	1	61	175	75	Male	0
1	0	1	25.05930703	0	0	1	0	1	0	0	40	173	75	Female	0
1	2	1	21.94750515	0	0	0	0	0	0	0	28	183	73.5	Male	0
0.768	2	1	22.09317005	0	0	0	1	1	1	0	58	178	70	Male	1
1	3	1	28.06642387	0	0	1	1	0	0	1	58	173	84	Male	1
1	2	1	25.40714556	0	0	1	1	1	1	1	49	178	80.5	Male	0
1	3	1	24.34380949	0	1	0	0	0	0	0	55	179	78	Male	0
1	2	1	20.51508648	0	0	0	1	0	1	0	40	178	65	Male	1
0.444	2	1	21.08134921	0	0	0	1	0	0	3	61	168	59.5	Male	1
0.768	3	1	21.36752137	0	0	0	0	1	0	0	57	156	52	Female	0
1	2	1	25.82644628	0	0	1	1	0	1	0	57	176	80	Male	0
0.768	3	1	25.35154137	0	0	1	1	1	1	0	33	172	75	Male	0
0.768	2	1	22.07409972	0	0	0	1	0	1	0	55	152	51	Female	1
0.693	3	1	23.183391	0	1	0	1	0	0	0	61	170	67	Male	0
0.768	3	1	20.56932966	0	0	0	1	1	0	0	36	165	56	Female	0
0.768	3	1	24.05693475	1	0	0	1	0	1	0	36	173	72	Male	0
1	0	1	27.74474832	0	0	1	1	1	1	1	47	174	84	Male	0
1	2	1	19.921875	0	0	0	1	1	0	0	34	160	51	Female	0
1	1	1	21.64412071	0	0	0	1	1	0	0	38	155	52	Female	0
1	1	1	24.09746484	0	0	0	1	0	0	3	47	183	80.7	Male	1
1	1	1	33.34713388	0	1	2	1	0	0	0	54	163	88.6	Female	0
1	1	1	19.65105602	0	0	0	1	0	0	0	34	165	53.5	Female	0
1	2	1	25.46938776	0	0	1	1	0	1	0	43	175	78	Male	1
1	2	1	25.3266063	0	0	1	1	0	1	0	51	173	75.8	Male	1
1	2	1	26.19618735	0	0	1	0	0	1	1	39	178	83	Male	1
1	3	1	23.61275089	0	0	0	0	0	1	1	49	154	56	Male	1
1	0	1	21.19274242	0	1	0	0	1	0	0	40	164	57	Female	0
1	3	1	20.04744562	0	0	0	0	0	1	0	49	173	60	Male	0
0.768	1	1	20.9839876	0	0	0	1	1	1	0	37	176	65	Male	1
1	2	1	24.05693475	0	0	0	1	1	1	1	44	173	72	Male	0
1	2	1	21.4532872	0	0	0	0	0	1	0	59	170	62	Male	1
1	0	1	24.15881797	0	1	0	1	1	1	0	39	169	69	Male	1
1	1	1	22.14427438	0	0	0	1	0	0	0	63	168	62.5	Male	0
1	2	1	21.2585034	0	0	0	1	1	1	1	63	168	60	Male	1
1	2	1	18.59012493	0	0	0	1	0	0	0	34	164	50	Female	1
1	2	1	19.47077787	0	1	0	0	1	1	0	46	177	61	Male	0
1	0	1	21.88707637	0	0	0	1	0	1	0	30	171	64	Male	1
1	0	1	21.6796875	0	0	0	1	0	0	1	52	160	55.5	Female	1
0.786	3	1	24.91990032	2	0	0	0	1	1	0	51	159	63	Male	1
1	3	1	18.91806675	0	0	0	0	0	0	0	20	149	42	Female	0
1	3	1	18.28989483	0	0	0	0	1	0	2	22	162	48	Female	0
1	1	1	21.22788762	0	0	0	1	1	0	1	27	155	51	Female	0
1	3	1	22.81638724	0	0	0	1	1	0	1	55	172	67.5	Male	0
1	3	1	21.5450908	0	0	0	1	1	1	0	43	171	63	Male	0
1	1	1	21.51385851	0	0	0	0	1	1	1	27	167	60	Female	0
1	3	1	22.82688094	0	0	0	1	1	0	1	32	148	50	Female	0
1	3	1	23.38868656	0	0	0	1	1	1	2	46	173	70	Male	0
0.786	3	1	21.33333333	0	1	0	0	1	0	3	47	150	48	Female	0
1	0	1	26.44897959	0	0	1	1	1	1	0	56	175	81	Male	1
1	1	1	19.57168128	0	0	0	0	1	0	0	29	163	52	Female	0
0.768	2	1	20.2020202	1	0	0	1	0	1	0	54	165	55	Male	1
0.768	2	1	24.08822312	0	0	0	1	1	0	1	49	163	64	Female	0
1	3	1	20.02884153	1	0	0	1	1	0	2	41	158	50	Female	0
1	1	1	19.65056175	0	0	0	1	0	0	0	35	153	46	Female	0
1	3	1	21.97133586	0	1	0	1	1	1	1	29	172	65	Male	1
0.768	2	1	24.33747972	0	0	0	1	0	1	0	48	172	72	Male	0
1	2	1	19.03114187	0	0	0	1	0	1	0	38	170	55	Male	0
1	3	1	19.04507334	0	1	0	0	1	0	0	35	173	57	Female	1
0.693	3	1	20.82999519	0	0	0	0	0	0	1	41	158	52	Female	1
1	1	1	20.9566075	0	1	0	1	0	0	0	54	156	51	Female	0
0.768	1	1	20.68515024	0	0	0	1	0	0	1	49	166	57	Female	1
1	3	1	22.46003435	0	0	0	1	1	0	1	57	174	68	Male	1
1	0	1	23.72528616	0	1	0	1	0	0	1	41	155	57	Female	0
0.705	1	1	22.20633069	2	0	0	1	0	1	0	59	163	59	Male	1
1	1	1	20.96326531	0	0	0	1	1	1	0	40	175	64.2	Male	0
1	0	1	23.03004535	0	0	0	1	1	1	1	54	168	65	Male	0
1	2	1	22.10028959	0	1	0	1	1	0	2	42	162	58	Female	0
1	1	1	20.34279778	0	0	0	1	0	0	1	43	152	47	Female	0
1	2	1	19.03114187	0	0	0	0	1	1	0	48	170	55	Male	1
1	3	1	26.25842251	0	0	1	0	0	1	2	37	174	79.5	Male	0
0.768	0	1	23.1206236	0	0	0	1	0	1	0	42	174	70	Male	1
0.482	1	1	19.36247266	0	1	0	0	1	0	0	35	167	54	Female	0
0.786	3	1	25.86451247	0	0	1	0	0	1	1	51	168	73	Male	1
1	2	1	18.06616734	0	0	0	1	1	1	0	34	163	48	Female	0
1	2	1	18.06616734	0	0	0	0	1	0	2	43	163	48	Female	1
1	0	1	27.04164413	0	0	1	0	1	1	4	36	172	80	Male	1
0.786	3	1	17.36044134	2	1	0	1	1	0	0	41	161	45	Female	0
0.768	3	1	17.70956316	0	0	0	1	0	1	0	40	154	42	Female	0
1	1	1	23.4375	1	0	0	1	0	1	0	33	160	60	Female	0
1	3	1	20.17325264	0	0	0	1	1	1	0	35	159	51	Female	0
1	3	1	24.22145329	0	1	0	0	0	1	1	34	170	70	Male	0
1	2	1	17.84651993	0	0	0	1	0	0	0	52	164	48	Female	0
1	0	1	24.22145329	0	0	0	1	1	1	0	61	170	70	Male	0
1	3	1	24.16326531	0	0	0	1	1	1	0	36	175	74	Male	0
1	3	1	21.10726644	0	1	0	1	0	1	2	58	170	61	Male	1
1	2	1	30.11621315	0	1	2	1	1	0	5	54	168	85	Male	1
1	3	1	23.87511478	0	0	0	1	1	0	1	62	165	65	Male	0
1	3	1	22.34879949	0	1	0	1	1	0	0	45	159	56.5	Female	0
1	3	1	14.69237833	0	0	0	1	1	0	0	49	165	40	Female	0
1	1	1	20.5078125	0	0	0	0	0	1	1	50	160	52.5	Female	0
0.768	3	1	21.03531856	1	0	0	1	0	0	0	63	152	48.6	Female	0
1	0	1	19.94805977	0	0	0	1	1	1	0	51	163	53	Female	1
0.768	2	1	19.3052686	0	0	0	0	0	0	0	56	176	59.8	Male	0
0.742	0	1	36.75365031	0	0	2	0	0	0	4	45	173	110	Male	0
1	2	1	23.42209073	0	0	0	0	0	1	2	40	156	57	Male	0
1	3	1	27.75510204	0	0	1	1	0	1	2	51	175	85	Male	0
1	3	1	19.94805977	0	1	0	1	0	0	1	62	163	53	Male	0
1	2	1	18.28989483	0	0	0	1	0	0	0	28	162	48	Female	0
1	0	1	24.22145329	0	0	0	1	1	1	0	53	170	70	Male	1
1	2	1	20.25462963	0	0	0	0	0	1	1	39	144	42	Female	1
1	3	1	20.93212013	0	0	0	1	1	1	3	37	153	49	Female	0
1	2	1	24.09297052	0	0	0	1	0	1	0	50	168	68	Male	1
1	0	1	24.16846944	0	0	0	0	1	0	1	46	172	71.5	Male	0
1	0	1	18.82711104	1	0	0	0	1	0	0	27	158	47	Female	1
0.693	3	1	24.615153	2	0	0	1	0	0	2	61	163	65.4	Male	0
0.768	3	1	18.75	2	0	0	1	0	0	0	44	160	48	Female	0
1	2	1	20.82093992	0	0	0	1	0	1	2	57	164	56	Male	1
1	1	1	18.90203813	0	0	0	1	1	0	0	35	156	46	Female	0
1	0	1	31.8877551	0	0	2	1	1	0	6	63	168	90	Male	1
1	3	1	25.07619305	0	1	1	1	1	0	0	59	161	65	Female	0
1	0	1	25.76298058	0	0	1	1	0	0	0	58	174	78	Male	1
1	0	1	23.72528616	0	0	0	1	0	0	0	57	155	57	Female	1
1	1	1	20.54959141	0	0	0	1	0	0	1	60	158	51.3	Female	0
1	1	1	20.71569381	0	0	0	1	1	1	0	36	173	62	Male	0
1	3	1	23.87543253	0	0	0	1	0	1	1	49	170	69	Male	1
1	1	1	21.36686914	0	1	0	1	1	1	1	37	181	70	Male	0
0.768	2	1	22.0603538	0	1	0	1	0	0	1	43	155	53	Female	0
1	0	1	24.8015873	0	0	0	1	0	1	0	34	168	70	Male	0
1	2	1	22.22222222	0	0	0	0	0	0	1	56	150	50	Female	0
1	3	1	33.33333333	0	0	2	1	0	1	7	57	180	108	Male	0
0.804	0	1	25.95155709	0	1	1	0	1	0	2	60	170	75	Male	0
1	1	1	28.3446712	0	0	1	0	0	1	4	59	168	80	Male	0
1	2	1	21.61281179	0	0	0	1	1	0	1	50	168	61	Male	0
1	1	1	23.92485822	1	1	0	1	0	0	4	59	184	81	Male	1
0.768	3	1	31.1634349	0	0	2	1	0	0	3	60	152	72	Female	0
0.649	3	1	27.28988242	0	1	1	1	1	0	4	64	166	75.2	Male	0
1	0	1	24.91349481	0	0	0	1	1	1	0	42	170	72	Male	0
0.768	2	1	29.70564407	0	0	1	1	1	1	2	56	161	77	Female	0
1	2	1	21.79944511	0	0	0	1	1	1	1	56	174	66	Male	0
1	2	1	19.73256729	0	0	0	1	0	0	1	60	171	57.7	Male	0
1	0	1	28.22838647	2	1	1	0	0	0	3	47	163	75	Male	1
1	2	1	20.41522491	0	1	0	1	0	1	3	59	170	59	Male	1
1	3	1	26.2226847	0	0	1	1	0	0	1	63	155	63	Female	0
0.768	3	1	22.03856749	0	0	0	1	1	1	1	63	165	60	Male	1
1	3	1	24.30461788	2	1	0	1	0	0	2	61	161	63	Female	0
1	2	1	23.62444749	0	0	0	1	1	0	1	63	162	62	Female	0
1	0	1	24.22145329	0	0	0	1	1	1	3	58	170	70	Male	1
1	1	1	22.46003435	0	0	0	0	1	0	1	62	174	68	Male	0
1	1	1	23.59700421	0	1	0	1	0	1	1	56	171	69	Male	0
1	2	1	30.48668503	0	0	2	1	0	0	4	60	165	83	Male	1
1	1	1	25.40281608	0	0	1	1	0	0	5	64	166	70	Male	0
0.649	3	1	21.56454491	0	0	0	0	0	0	0	58	164	58	Male	1
1	0	1	22.03856749	0	0	0	1	1	0	0	55	165	60	Female	0
1	1	1	20.3515625	0	0	0	1	1	0	0	56	160	52.1	Female	0
0.768	3	1	17.70956316	0	0	0	0	1	1	0	21	154	42	Female	0
1	0	1	25.6311675	0	1	1	1	1	0	0	38	153	60	Female	0
0.768	1	1	21.484375	0	0	0	0	1	1	1	41	160	55	Female	1
0.786	0	1	19.25936942	2	0	0	0	0	0	1	33	164	51.8	Female	0
1	3	1	25.95155709	0	1	1	1	0	1	0	59	170	75	Male	0
0.768	3	1	21.50188649	1	0	0	0	1	0	0	61	157	53	Female	0
1	0	1	22.83737024	2	0	0	1	1	1	2	50	170	66	Male	0
1	2	1	25.08650519	0	0	1	1	1	1	0	51	170	72.5	Male	1
0.768	3	1	23.93948099	0	0	0	1	1	1	0	57	177	75	Male	1
0.768	3	1	19.32223543	0	0	0	1	0	1	0	40	174	58.5	Male	1
1	3	1	23.18367347	0	0	0	1	1	1	1	56	175	71	Male	0
0.705	2	1	19.72318339	2	0	0	1	0	0	0	58	170	57	Male	0
1	0	1	26.49302563	0	0	1	1	1	1	0	37	177	83	Male	0
1	0	1	23.52941177	0	1	0	1	0	0	0	50	170	68	Male	0
1	0	1	27.46481071	0	1	1	1	0	0	2	58	179	88	Male	0
1	1	1	18.40134298	0	1	0	1	1	1	0	53	176	57	Male	0
1	0	1	21.71806609	0	1	0	1	1	0	0	61	173	65	Male	0
1	0	1	21.36752137	0	0	0	0	1	0	0	52	156	52	Female	0
0.768	1	1	20.44674202	1	0	0	1	0	0	0	54	161	53	Female	1
1	1	1	18.13201651	0	0	0	1	1	0	0	32	161	47	Female	0
1	3	1	21.56454491	0	0	0	1	0	0	0	49	164	58	Female	0
0.768	3	1	24.33747972	0	1	0	1	0	0	2	59	172	72	Male	1
1	0	1	17.52781588	0	1	0	0	0	0	1	48	162	46	Female	0
1	2	1	28.37370242	0	0	1	1	0	1	0	51	170	82	Male	1
1	1	1	28.83379247	0	0	1	1	1	1	0	50	165	78.5	Male	1
0.768	1	1	21.4532872	0	0	0	0	1	0	25	57	170	62	Male	0
1	3	1	22.0603538	0	0	0	1	1	1	0	39	155	53	Male	0
1	2	1	23.70242215	0	1	0	1	1	1	0	41	170	68.5	Male	0
0.768	3	1	21.70512943	0	1	0	1	1	1	2	37	177	68	Male	1
1	3	1	21.75546853	1	0	0	1	0	1	0	31	159	55	Female	1
1	0	1	26.67487432	0	0	1	1	0	1	2	64	171	78	Male	0
1	1	1	23.67125363	0	0	0	1	0	1	1	53	178	75	Male	0
1	0	1	25.05930703	1	0	1	1	1	1	1	56	173	75	Male	0
1	3	1	30.86419753	0	1	2	0	1	1	3	42	180	100	Male	0
1	0	1	23.0400202	0	1	0	1	1	1	0	36	178	73	Male	0
1	1	1	23.38868656	0	0	0	0	0	0	0	59	173	70	Male	1
0.768	1	1	21.09619052	0	0	0	0	1	0	0	26	157	52	Female	0
1	1	1	22.32142857	0	0	0	1	1	1	0	57	168	63	Male	0
1	0	1	22.41026928	0	1	0	1	0	1	1	53	167	62.5	Male	0
1	3	1	21.144641	0	0	0	1	1	0	1	41	155	50.8	Female	0
1	0	1	25.96952909	0	0	1	0	0	0	0	21	152	60	Female	0
1	1	1	19.50059453	0	0	0	1	0	0	2	63	145	41	Female	0
1	2	1	18.61149585	1	1	0	0	1	0	0	53	152	43	Female	0
0.711	3	1	21.484375	1	0	0	0	1	0	1	62	160	55	Male	0
0.768	1	1	24.81632653	0	0	0	1	1	1	2	45	175	76	Male	0
0.768	2	1	22.53061225	0	1	0	1	1	0	2	63	175	69	Male	0
0.768	3	1	25.25951557	0	0	1	1	0	1	1	49	170	73	Male	1
0.768	3	1	28.40550436	1	1	1	0	0	1	0	25	178	90	Male	1
0.768	1	1	22.85714286	0	1	0	1	1	1	0	57	175	70	Male	1
0.768	3	1	19.72318339	0	1	0	1	0	0	0	54	170	57	Male	1
0.631	3	1	19.56823633	2	0	0	1	1	1	0	43	178	62	Male	0
1	0	1	20.9572742	0	0	0	0	1	1	0	53	172	62	Male	1
1	0	1	22.22906193	0	0	0	1	0	1	0	42	171	65	Male	0
1	0	1	18.25310979	0	0	0	1	0	1	0	37	172	54	Female	0
1	1	1	17.89802289	0	0	0	1	0	0	1	63	155	43	Female	0
1	0	1	20.02884153	0	0	0	0	0	0	1	49	158	50	Female	0
1	3	1	22.22222222	0	0	0	1	0	0	0	63	180	72	Male	0
1	3	1	21.36752137	0	0	0	1	1	0	0	36	156	52	Female	0
1	3	1	19.91836735	0	1	0	1	1	1	0	39	175	61	Male	0
0.768	1	1	22.22222222	0	0	0	1	0	0	0	55	180	72	Male	1
1	1	1	22.09317005	0	1	0	1	1	1	0	29	178	70	Male	0
0.786	3	1	19.59645812	2	0	0	0	0	0	1	37	166	54	Female	1
1	1	1	23.61275089	1	0	0	1	1	0	0	55	154	56	Female	0
1	2	1	20.11222282	2	0	0	0	1	1	0	28	172	59.5	Male	0
0.768	3	1	26.81223718	1	0	1	1	0	0	0	42	161	69.5	Female	1
1	2	1	19.33372992	0	0	0	1	1	0	0	28	164	52	Female	0
1	2	1	19.53125	0	0	0	0	1	1	0	44	160	50	Female	0
0.768	2	1	18.0993751	0	1	0	0	1	1	1	45	162	47.5	Female	1
1	2	1	19.921875	0	0	0	0	1	1	0	35	160	51	Male	0
0.768	2	1	22.77318641	0	0	0	1	1	1	0	52	165	62	Male	0
1	0	1	22.85714286	0	0	0	0	1	1	1	39	175	70	Male	0
0.768	3	1	20.56932966	0	0	0	1	1	0	0	49	165	56	Female	0
1	0	1	21.20310523	0	0	0	0	0	1	0	37	171	62	Male	0
1	3	1	22.93337068	0	1	0	1	1	1	0	59	169	65.5	Male	0
1	2	1	24.41927902	0	1	0	1	1	1	0	45	181	80	Male	0
0.768	2	1	23.10843458	0	1	0	0	0	1	0	38	169	66	Male	1
1	2	1	20.54988662	1	0	0	1	0	1	0	36	168	58	Male	1
1	0	1	24.97704316	1	0	0	1	1	1	4	58	165	68	Male	0
0.768	3	1	20.51508648	0	0	0	1	0	0	2	58	178	65	Male	0
0.768	3	1	20.71569381	0	0	0	0	0	1	0	29	173	62	Male	1
1	1	1	23.85798817	0	0	0	1	0	0	1	64	162.5	63	Female	0
0.768	2	1	20.31394275	0	1	0	1	0	0	2	62	171	59.4	Male	0
1	3	1	21.4532872	0	0	0	1	1	0	1	61	170	62	Male	0
0.768	3	1	29.38475666	0	0	1	1	0	0	4	62	165	80	Male	0
1	2	1	27.13087641	0	0	1	1	1	1	0	50	173	81.2	Male	0
1	2	1	20.17587114	0	0	0	1	1	0	1	60	156	49.1	Female	0
1	3	1	27.36455464	2	0	1	1	1	1	1	54	165	74.5	Male	1
1	3	1	19.56295526	0	0	0	1	0	0	0	54	155	47	Female	0
0.693	3	1	17.4817898	0	0	0	0	0	0	0	47	155	42	Female	0
0.768	2	1	25.390625	2	0	1	0	1	0	0	56	160	65	Male	0
1	3	1	20.20919422	0	0	0	1	1	1	0	48	176	62.6	Male	0
0.768	3	1	17.8200692	0	0	0	1	0	1	0	44	170	51.5	Female	1
1	1	1	26.29656684	0	1	1	0	0	0	0	38	185	90	Male	0
0.768	2	1	20.83252961	0	0	0	1	1	0	0	48	161	54	Female	0
1	2	1	23.66143862	0	0	0	1	1	1	1	55	172	70	Male	1
0.768	3	1	19.53125	0	0	0	0	0	0	0	27	160	50	Female	0
1	1	1	23.53304271	0	1	0	0	0	1	3	49	161	61	Male	0
1	3	1	25.64891762	0	0	1	1	0	1	0	52	171	75	Male	1
0.768	3	1	19.57168128	0	0	0	1	1	1	0	37	163	52	Female	0
1	3	1	20.04744562	1	0	0	1	1	1	1	36	173	60	Male	0
1	3	1	19.81784449	2	0	0	0	0	1	0	24	154	47	Female	0
1	2	1	31.40766481	1	0	2	1	0	1	3	57	173	94	Male	1
0.631	3	1	20.76124568	1	0	0	1	0	0	1	62	170	60	Male	1
1	0	1	26.7299275	0	1	1	1	0	0	3	61	173	80	Male	1
1	3	1	21.71806609	0	0	0	1	1	0	0	44	173	65	Male	0
1	0	1	27.34375	2	0	1	0	0	0	0	47	160	70	Female	0
0.473	3	1	24.22145329	0	1	0	1	0	1	2	43	170	70	Male	1
0.693	3	1	21.79930796	0	0	0	0	0	1	0	60	170	63	Male	1
1	2	1	25.13593926	0	0	1	1	1	1	0	58	171	73.5	Male	1
1	2	1	20.28479857	1	0	0	1	0	0	0	52	157	50	Female	0
1	0	1	16.90102758	1	0	0	0	1	0	0	36	172	50	Male	0
1	0	1	27.04164413	0	0	1	1	1	1	0	41	172	80	Male	0
1	2	1	28.57796068	0	0	1	1	1	1	0	38	162	75	Male	0
0.693	3	1	23.07765968	1	0	0	0	0	0	2	55	177	72.3	Male	0
1	0	1	21.45357371	0	0	0	1	0	0	1	60	163	57	Male	0
0.768	2	1	22.14532872	0	1	0	1	0	0	2	63	170	64	Male	0
0.768	3	1	21.22788762	0	1	0	1	0	0	2	64	155	51	Female	0
0.58	3	1	30.17411517	1	0	2	1	0	0	2	63	151	68.8	Female	0
1	2	1	20.28479857	0	1	0	1	0	0	1	63	157	50	Female	0
1	1	1	20.81165453	0	0	0	1	0	0	0	64	155	50	Female	0
0.43	1	1	23.87511478	0	1	0	1	1	1	0	47	165	65	Male	0
0.768	3	1	19.47340663	0	0	0	1	1	0	1	49	157	48	Female	0
0.705	3	1	19.72103697	1	1	0	1	1	0	0	55	167	55	Female	0
0.768	3	1	26.25958475	0	0	1	1	0	1	2	55	169	75	Male	1
0.768	0	1	21.6214278	0	0	0	0	1	1	0	24	167	60.3	Male	0
1	1	1	18.69806094	0	1	0	1	0	1	1	50	152	43.2	Female	0
0.768	3	1	21.79930796	0	1	0	1	1	0	3	64	170	63	Male	0
1	0	1	26.85440557	0	0	1	0	1	1	0	55	166	74	Male	0
0.742	2	1	27.6816609	2	0	1	1	0	1	3	44	170	80	Male	0
1	0	1	21.45357371	0	0	0	1	1	0	3	45	163	57	Female	1
1	1	1	24.16326531	0	0	0	1	0	1	1	38	175	74	Male	0
1	1	1	24.21229339	0	0	0	1	1	1	0	52	176	75	Male	1
0.768	3	1	26.76977989	0	0	1	1	1	0	0	62	164	72	Male	1
1	0	1	20	0	0	0	1	0	0	0	52	150	45	Female	0
0.768	3	1	22.26847034	1	1	0	1	0	0	0	61	155	53.5	Female	0
0.768	2	1	22.72440348	0	1	0	0	1	0	1	58	178	72	Male	0
0.768	1	1	20.3125	0	0	0	1	0	0	0	50	160	52	Female	0
1	2	1	21.28027682	1	1	0	0	1	0	1	62	170	61.5	Male	0
0.724	3	1	22.2136785	1	0	0	0	0	1	0	52	153	52	Female	1
1	3	1	27.06405159	1	0	1	0	0	1	0	39	173	81	Male	0
0.649	2	1	19.39618823	0	0	0	0	1	0	0	51	154	46	Female	1
0.768	2	1	22.95436133	0	0	0	1	1	0	1	60	161	59.5	Female	0
0.768	2	1	18.85882198	0	1	0	1	0	0	2	64	151	43	Female	0
1	3	1	26.89232314	0	0	1	1	1	1	1	57	167	75	Male	0
1	0	1	20.76124568	0	1	0	1	1	1	0	35	170	60	Male	1
0.786	1	1	17.96875	2	1	0	0	1	0	0	23	160	46	Female	0
1	0	1	17.63085399	2	1	0	1	0	1	0	38	165	48	Female	0
1	0	1	20.77562327	1	1	0	1	1	1	1	51	190	75	Male	1
1	3	1	21.97133586	2	1	0	0	1	1	0	25	172	65	Male	1
1	0	1	19.605192	2	0	0	0	1	1	0	25	172	58	Male	0
1	2	1	28.76397107	0	0	1	1	1	1	0	35	156	70	Female	1
0.705	2	1	22.14532872	2	1	0	1	1	0	0	44	170	64	Male	0
1	0	1	21.875	2	0	0	0	1	1	0	22	160	56	Female	0
1	0	1	18.02595738	0	0	0	0	0	0	0	26	158	45	Female	0
0.705	1	1	28.73174689	0	0	1	0	0	1	1	38	172	85	Male	0
0.73	3	1	21.4532872	1	1	0	0	0	0	6	50	170	62	Male	1
0.693	3	1	34.29380171	2	1	2	0	0	0	2	63	166	94.5	Male	0
0.786	3	1	29.68495643	1	1	1	0	0	0	1	28	177	93	Male	0
1	1	1	21.383942	0	0	0	1	1	1	0	31	173	64	Male	0
0.654	2	1	17.91584484	2	1	0	0	1	0	0	59	156	43.6	Female	1
1	3	1	20.54988662	2	0	0	0	1	1	0	46	168	58	Female	1
1	0	1	20.93425606	1	0	0	0	0	0	0	25	170	60.5	Male	0
1	2	1	21.2244898	0	0	0	1	1	1	0	27	175	65	Male	1
0.736	3	1	21.9651056	2	1	0	0	0	0	0	29	165	59.8	Female	0
0.656	1	1	27.6816609	2	0	1	0	1	0	0	32	170	80	Male	0
0.786	5	2	19.81784449	2	0	0	1	1	0	0	43	154	47	Female	1
0.705	5	2	18.71804237	2	0	0	1	1	0	1	43	148	41	Female	0
0.656	5	2	15.61472715	2	0	0	1	1	0	2	39	156	38	Female	0
0.768	7	2	19.46740129	2	0	0	0	1	0	0	49	165	53	Male	1
0.705	7	2	31.14186851	0	1	2	1	0	1	0	38	170	90	Male	0
1	6	2	30.08005924	1	0	2	1	0	0	3	62	147	65	Female	0
1	7	2	21.75546853	1	0	0	0	0	0	0	52	159	55	Female	0
0.768	5	2	19.81767737	0	0	0	0	0	0	0	52	174	60	Male	0
1	7	2	25.6543724	1	1	1	1	1	1	0	37	164	69	Male	0
0.768	6	2	22.07409972	0	1	0	1	0	0	2	45	152	51	Female	0
1	5	2	16.9550173	1	0	0	0	0	0	0	36	170	49	Female	0
1	4	2	19.53125	0	0	0	1	1	1	0	31	160	50	Female	1
1	6	2	23.24380165	0	0	0	1	0	1	0	33	176	72	Male	0
0.786	5	2	20.83070319	2	0	0	1	1	1	0	34	178	66	Male	1
0.768	4	2	19.1953028	0	1	0	1	1	0	2	45	163	51	Female	0
0.768	4	2	25.27120316	0	0	1	0	0	0	0	54	156	61.5	Female	1
0.705	7	2	20.10405827	0	1	0	1	0	0	0	62	155	48.3	Female	0
1	6	2	24.76756592	2	0	0	0	1	1	0	47	162	65	Male	0
0.631	7	2	19.88385305	2	0	0	1	1	0	0	61	178	63	Male	1
0.705	7	2	22.5710475	0	0	0	1	0	0	0	53	171	66	Male	0
0.786	6	2	18.42653421	1	0	0	1	1	0	0	35	158	46	Female	0
0.649	6	2	19.56295526	0	0	0	1	1	0	0	62	155	47	Female	0
1	4	2	23.03004535	0	1	0	0	0	1	0	39	168	65	Male	0
0.705	5	2	21.2244898	2	0	0	0	1	1	0	25	175	65	Male	0
1	4	2	20.06920415	2	0	0	1	0	0	0	26	170	58	Male	0
1	4	2	20.97370855	0	0	0	1	0	1	1	30	174	63.5	Male	1
0.649	7	2	20.45288532	0	0	0	0	0	0	0	28	185	70	Male	0
0.768	5	2	18.87760337	0	0	0	1	1	0	0	35	171	55.2	Female	0
0.705	7	2	31.14186851	1	1	2	0	1	0	1	43	170	90	Male	1
0.587	5	2	24.05693475	2	0	0	0	1	1	0	38	173	72	Male	1
0.768	4	2	23.52941177	2	0	0	1	1	1	0	55	170	68	Male	0
0.587	7	2	22.67573696	1	0	0	1	1	0	1	58	168	64	Male	1
1	7	2	23.52941177	1	1	0	1	1	1	2	57	170	68	Male	1
0.649	6	2	17.8925737	0	0	0	0	1	0	1	53	168	50.5	Male	0
0.768	6	2	18.18181818	0	0	0	1	1	0	1	54	165	49.5	Female	0
0.705	6	2	19.10009183	0	0	0	0	0	0	0	57	165	52	Female	1
0.58	7	2	24.44180209	1	0	0	0	0	0	0	44	174	74	Male	1
0.768	5	2	22.03840116	0	0	0	0	0	0	0	26	182	73	Male	1
0.724	6	2	21.0498179	1	0	0	0	1	0	0	30	173	63	Male	0
1	7	2	22.1481514	0	0	0	1	0	0	0	42	151	50.5	Female	0
1	7	2	25.5367036	0	0	1	1	1	0	0	38	152	59	Female	0
0.786	4	2	19.78997095	2	0	0	0	0	0	0	55	177	62	Male	1
0.768	4	2	29.06976744	0	0	1	1	1	1	0	46	172	86	Male	0
0.705	7	2	18.28677973	1	0	0	0	0	0	0	20	167	51	Female	0
1	5	2	24.77209671	1	0	0	0	1	1	0	31	174	75	Male	1
1	4	2	21.35991456	0	1	0	1	1	0	0	61	159	54	Female	0
1	6	2	24.93372049	0	0	0	1	1	1	2	56	178	79	Male	0
1	6	2	21.77843524	0	0	0	1	0	0	0	26	156	53	Female	0
1	7	2	27.66381874	0	1	1	1	0	1	1	49	163	73.5	Male	0
1	5	2	18.5528757	1	0	0	1	1	1	2	58	154	44	Female	0
0.768	7	2	20.57613169	0	0	0	1	1	0	1	54	162	54	Female	0
0.768	6	2	19.53125	2	0	0	0	0	0	0	29	160	50	Male	0
0.768	4	2	26.42356982	0	0	1	1	1	1	0	36	174	80	Male	0
0.705	4	2	29.21010994	2	0	1	1	0	0	2	47	157	72	Female	0
0.786	4	2	18.359375	2	0	0	0	1	1	0	26	160	47	Female	1
0.768	4	2	27.59328584	0	1	1	1	0	1	1	47	182	91.4	Male	0
1	4	2	21.4532872	0	0	0	1	0	1	0	28	170	62	Male	0
1	5	2	17.96875	1	0	0	0	0	0	0	22	160	46	Female	1
0.786	5	2	19.37919743	1	0	0	0	0	1	1	28	173	58	Male	0
0.705	6	2	22.49134948	1	0	0	1	1	1	0	28	170	65	Male	1
0.786	6	2	21.71608358	1	0	0	0	1	1	0	40	171	63.5	Male	0
0.768	7	2	19.38214469	0	1	0	1	1	0	0	35	159	49	Female	0
1	4	2	18.66201469	1	0	0	1	0	0	3	47	157	46	Female	0
0.587	7	2	29.76190476	2	0	1	0	0	0	0	42	168	84	Male	1
1	5	2	21.85223725	0	0	0	1	1	1	1	41	155	52.5	Female	0
0.768	7	2	20.44674202	1	0	0	0	0	1	2	35	161	53	Male	0
1	4	2	19.00390835	0	0	0	0	1	1	0	48	167	53	Male	0
0.705	7	2	26.61934339	1	0	1	0	1	1	2	35	161	69	Female	1
0.768	5	2	19.39618823	2	0	0	1	1	1	1	55	154	46	Female	0
0.705	7	2	32.40740741	0	1	2	0	0	0	0	23	180	105	Male	0
0.768	6	2	20.69049454	0	0	0	1	1	0	0	43	157	51	Female	0
1	4	2	18.6122449	0	0	0	0	1	0	0	21	175	57	Male	0
1	5	2	20.44674202	0	0	0	1	1	0	0	35	161	53	Female	0
1	7	2	21.78649238	0	0	0	0	1	1	0	23	153	51	Female	1
0.786	6	2	21.22280828	2	1	0	0	0	0	0	25	179	68	Male	0
1	6	2	22.20408163	0	0	0	1	1	1	1	49	175	68	Male	0
1	4	2	21.05170826	2	0	0	1	0	1	0	55	151	48	Female	0
1	4	2	20.59860803	0	0	0	1	0	1	1	44	179	66	Male	0
0.786	7	2	23.03004535	0	0	0	0	0	0	0	32	168	65	Male	0
1	4	2	24.05693475	1	0	0	1	1	1	1	52	173	72	Male	1
1	7	2	21.03028361	2	0	0	0	1	1	1	27	158	52.5	Female	0
0.768	5	2	23.62444749	0	0	0	0	0	0	2	42	162	62	Female	0
1	7	2	19.70553242	0	0	0	1	0	0	0	44	164	53	Female	0
0.768	4	2	16.82422689	0	0	0	1	0	0	0	25	158	42	Female	1
0.786	4	2	20.93212013	2	0	0	1	0	0	0	46	153	49	Female	1
0.705	7	2	20.19557823	1	1	0	1	1	1	0	37	168	57	Male	0
1	5	2	23.23765616	2	0	0	0	0	1	1	50	164	62.5	Male	1
0.768	5	2	19.03114187	0	0	0	0	1	1	0	36	170	55	Male	1
1	7	2	17.34842951	0	0	0	1	1	0	0	34	148	38	Female	0
0.705	7	2	21.71925011	2	0	0	0	0	1	0	42	162	57	Female	1
1	5	2	36.00211389	0	1	2	0	0	0	0	44	174	109	Male	0
1	5	2	21.5349084	1	0	0	1	1	1	0	31	179	69	Male	0
1	4	2	24.77209671	0	1	0	1	1	1	0	41	174	75	Male	0
1	5	2	30.79584775	0	0	2	0	0	0	2	57	170	89	Male	0
0.654	6	2	29.36576335	0	0	1	1	0	1	1	41	177	92	Male	0
0.768	7	2	21.36752137	0	0	0	0	1	1	0	56	156	52	Female	1
0.786	4	2	21.09375	1	0	0	1	0	1	0	59	160	54	Male	0
0.705	6	2	23.88844098	2	0	0	0	0	0	1	27	183	80	Male	1
1	5	2	20.54988662	0	1	0	1	1	0	1	53	168	58	Female	0
1	4	2	19.53125	0	0	0	1	1	0	0	36	160	50	Female	0
0.786	5	2	20.51508648	2	1	0	1	1	1	0	36	178	65	Male	0
0.768	4	2	24.55775234	0	0	0	1	0	0	0	64	155	59	Female	0
1	6	2	19.13265306	2	0	0	0	0	1	0	25	168	54	Male	0
0.768	5	2	23.23345618	0	0	0	1	1	0	0	35	158	58	Female	0
0.768	5	2	19.66411565	0	0	0	0	0	1	2	38	168	55.5	Male	0
0.768	4	2	18.61149585	1	0	0	1	0	0	0	39	152	43	Female	0
0.705	5	2	25.10387812	2	0	1	1	1	0	1	49	152	58	Female	0
0.705	6	2	20.2812331	2	0	0	0	1	1	0	30	172	60	Male	1
0.768	5	2	22.68244576	0	0	0	1	1	1	0	56	156	55.2	Female	1
0.786	7	2	20.93663912	2	0	0	0	1	1	0	30	165	57	Female	0
0.654	4	2	20.2812331	0	0	0	1	1	1	0	40	172	60	Male	0
1	6	2	20.93663912	0	0	0	1	1	1	0	44	165	57	Male	0
0.693	6	2	25.10387812	0	0	1	1	0	0	1	57	152	58	Female	0
0.705	5	2	17.74104683	1	1	0	0	0	0	0	28	165	48.3	Female	1
1	5	2	21.97133586	0	0	0	1	1	1	0	42	172	65	Male	0
0.768	7	2	22.09317005	0	0	0	1	0	1	0	32	178	70	Male	1
0.786	7	2	23.22543185	1	0	0	0	1	0	1	37	166	64	Female	0
0.768	6	2	24.67550027	0	0	0	0	1	0	0	42	172	73	Male	0
0.768	7	2	22.3183391	0	0	0	1	1	1	0	44	170	64.5	Male	0
1	5	2	22.49134948	1	0	0	0	1	0	1	50	170	65	Male	1
1	7	2	19.44444444	2	0	0	0	1	0	0	34	180	63	Male	0
1	4	2	22.20408163	2	1	0	1	0	0	0	57	175	68	Male	1
0.768	5	2	21.67125804	0	1	0	1	1	1	0	44	165	59	Male	1
1	4	2	19.59183674	0	0	0	0	1	1	1	27	175	60	Male	0
1	4	2	22.03856749	0	0	0	1	0	0	1	45	165	60	Female	0
1	4	2	20.3125	0	1	0	1	1	0	0	36	160	52	Female	0
1	5	2	29.70564407	0	0	1	1	0	1	0	36	161	77	Male	0
1	7	2	20.54569362	0	0	0	1	1	0	0	39	156	50	Female	0
0.705	5	2	22.14532872	1	0	0	0	0	0	1	37	170	64	Male	0
1	5	2	21.383942	1	0	0	1	1	1	0	44	173	64	Male	1
0.768	7	2	21.55103349	0	0	0	1	0	1	3	37	158	53.8	Female	1
0.649	4	2	21.96712018	2	0	0	1	0	0	1	63	168	62	Male	1
1	4	2	22.30814991	0	0	0	0	0	0	0	37	164	60	Male	1
0.786	7	2	28.19428425	0	0	1	1	1	0	0	27	153	66	Female	0
0.786	6	2	17.44492677	2	1	0	0	0	0	0	21	157	43	Female	0
0.786	6	2	17.63085399	1	0	0	1	1	0	0	33	165	48	Female	0
0.768	4	2	18.61149585	0	0	0	1	1	0	1	52	152	43	Female	0
0.768	5	2	18.13201651	0	0	0	0	0	0	1	21	161	47	Female	0
0.768	7	2	21.64412071	0	0	0	1	0	0	0	43	155	52	Female	0
0.768	7	2	20.06095444	0	1	0	1	0	0	0	46	161	52	Female	0
0.768	4	2	23.30668005	0	0	0	0	0	0	0	41	167	65	Female	1
0.768	6	2	21.08358134	0	0	0	1	0	1	0	57	167	58.8	Male	1
0.705	6	2	20.54432554	1	1	0	1	1	0	0	59	174	62.2	Male	0
1	5	2	25.20920136	0	0	1	1	1	0	0	52	169	72	Male	1
1	5	2	21.1552942	0	0	0	0	1	1	0	39	167	59	Male	0
1	7	2	21.484375	0	0	0	1	0	0	0	56	160	55	Female	0
0.768	6	2	16.95625667	0	1	0	1	0	0	1	48	162	44.5	Female	1
0.705	7	2	25.24933721	1	0	1	0	1	1	0	29	178	80	Male	1
1	6	2	22.65625	0	0	0	0	0	0	0	64	160	58	Male	1
0.768	7	2	19.59645812	0	0	0	0	0	0	0	47	166	54	Female	0
0.768	4	2	21.8299522	0	0	0	0	0	0	0	35	163	58	Male	0
0.705	4	2	19.140625	0	0	0	1	1	0	1	33	160	49	Female	0
1	6	2	18.75	1	0	0	1	0	0	0	39	160	48	Female	0
0.768	4	2	18.8246262	0	0	0	1	1	1	1	43	167	52.5	Male	0
0.608	6	2	25.95155709	1	0	1	1	0	1	0	47	170	75	Male	1
1	7	2	21.0498179	0	0	0	1	1	0	0	37	173	63	Male	0
0.768	5	2	18.59113034	1	0	0	1	1	1	1	40	172	55	Male	1
1	7	2	21.35930625	2	0	0	1	0	0	2	40	153	50	Female	0
1	5	2	21.87755102	2	1	0	1	0	1	0	44	175	67	Male	1
0.786	7	2	31.21748179	1	0	2	1	1	0	0	45	155	75	Female	1
1	5	2	21.80232558	2	0	0	1	0	1	0	35	172	64.5	Male	1
1	4	2	27.75510204	0	0	1	0	0	1	0	45	175	85	Male	1
1	6	2	17.27577252	1	0	0	0	0	0	0	22	163	45.9	Female	0
1	4	2	28.92833662	0	0	1	1	1	0	0	39	156	70.4	Female	0
0.768	6	2	22.85714286	0	1	0	1	0	0	0	60	175	70	Male	1
1	7	2	22.77318641	0	0	0	0	0	1	0	56	165	62	Female	0
0.768	4	2	23.93898978	2	1	0	1	0	0	0	60	171	70	Male	1
1	4	2	21.09619052	0	0	0	1	1	0	0	61	157	52	Female	0
1	6	2	21.51385851	0	0	0	0	0	1	0	34	167	60	Female	0
0.768	7	2	23.10843458	0	1	0	1	1	1	3	59	169	66	Male	0
1	7	2	22.23098713	0	0	0	1	1	1	0	44	167	62	Male	1
1	6	2	20.61925365	0	0	0	1	1	0	0	29	172	61	Male	0
0.786	5	2	20.9566075	1	0	0	0	1	1	0	60	156	51	Female	0
1	7	2	22.85714286	1	0	0	0	1	1	0	32	175	70	Male	0
1	4	2	18.42403628	0	0	0	0	1	1	0	36	168	52	Male	0
1	4	2	18.13201651	0	0	0	1	0	0	0	62	161	47	Female	0
0.768	5	2	19.77777778	0	0	0	0	1	1	0	56	150	44.5	Female	0
0.768	4	2	18.36900338	0	0	0	1	0	0	2	49	153	43	Female	1
1	6	2	24.48979592	1	0	0	1	0	1	0	49	175	75	Male	0
0.693	4	2	35.01277967	0	0	2	1	1	1	1	59	169	100	Male	0
1	6	2	21.45357371	0	0	0	1	1	0	0	61	163	57	Female	1
1	5	2	21.56454491	1	1	0	1	0	0	0	53	164	58	Female	0
1	7	2	24.22145329	2	0	0	0	0	1	0	35	170	70	Male	0
1	4	2	25.0995016	1	0	1	0	0	0	1	47	167	70	Female	0
0.768	5	2	18.5178041	0	1	0	0	0	0	0	62	161	48	Female	0
0.768	7	2	27.21730295	0	0	1	1	0	1	0	59	166	75	Male	0
1	5	2	25.86451247	0	0	1	1	0	1	1	56	168	73	Male	1
0.786	6	2	17.21108681	0	0	0	1	0	1	0	45	167	48	Female	1
0.768	4	2	29.91159884	0	0	1	0	0	1	0	47	162	78.5	Male	0
0.768	5	2	20.04744562	0	0	0	1	0	1	0	41	173	60	Male	0
1	6	2	25.94548396	0	0	1	0	0	1	2	51	181	85	Male	1
0.705	7	2	20.90419501	1	0	0	0	0	0	0	47	168	59	Male	0
0.768	6	2	30.07116843	0	1	2	1	1	1	2	57	173	90	Male	0
0.768	4	2	19.83516296	0	0	0	1	1	1	0	45	171	58	Male	1
0.768	4	2	21.90976985	0	0	0	1	0	0	1	50	162	57.5	Female	0
0.768	6	2	23.11111111	0	0	0	0	0	0	0	63	150	52	Female	1
0.768	7	2	26.5625	0	1	1	0	1	1	0	29	160	68	Female	0
1	6	2	25.95155709	1	0	1	0	1	0	0	52	170	75	Male	0
0.768	7	2	22.18934911	0	1	0	1	0	0	0	51	156	54	Female	0
0.768	6	2	19.28937927	0	0	0	1	1	0	0	46	161	50	Female	0
1	7	2	19.55555556	0	0	0	1	1	0	0	50	150	44	Female	0
0.786	6	2	19.72103697	2	0	0	0	0	0	0	27	167	55	Female	1
0.661	6	2	26.82742078	0	0	1	0	0	0	0	42	178	85	Male	0
1	4	2	27.69928614	1	0	1	1	0	1	0	55	164	74.5	Male	1
1	4	2	23.42209073	0	0	0	1	1	0	0	52	156	57	Female	0
1	4	2	19.01582233	0	0	0	0	0	1	0	26	166	52.4	Male	1
1	4	2	23.38868656	0	1	0	1	1	1	2	52	173	70	Male	1
0.768	4	2	22.77318641	0	0	0	1	1	1	0	39	165	62	Female	1
1	5	2	23.14049587	0	1	0	1	0	1	0	31	165	63	Male	0
1	5	2	21.2585034	0	0	0	0	0	0	0	44	168	60	Male	0
0.786	5	2	22.85714286	2	0	0	0	0	0	0	59	175	70	Male	1
1	5	2	19.82072971	0	0	0	0	1	0	0	22	178	62.8	Male	0
0.768	5	2	19.15708812	1	0	0	0	1	0	0	38	174	58	Male	1
1	4	2	20.45114618	0	1	0	1	0	0	0	49	181	67	Male	0
0.786	6	2	19.31295201	2	0	0	0	0	0	0	51	156	47	Female	1
0.768	4	2	21.2585034	0	1	0	1	0	0	1	49	168	60	Male	1
1	4	2	20.07960128	0	0	0	1	1	1	0	26	167	56	Male	0
0.768	5	2	17.99015276	0	0	0	1	1	0	0	32	178	57	Male	0
0.768	7	2	20.57613169	0	0	0	1	1	1	0	39	162	54	Female	0
1	7	2	20.2020202	2	0	0	0	1	1	0	54	165	55	Male	0
1	4	2	23.94816208	0	0	0	0	0	1	1	27	183	80.2	Male	1
0.587	6	2	22.89882421	0	0	0	1	0	0	0	43	166	63.1	Female	0
0.768	6	2	23.93606232	0	0	0	1	0	0	1	48	157	59	Female	1
0.768	7	2	21.71925011	0	0	0	0	0	1	1	50	162	57	Female	0
0.736	7	2	23.38435374	2	0	0	1	0	1	0	47	168	66	Male	0
0.592	7	2	20.06920415	1	1	0	1	0	0	0	46	170	58	Male	1
1	6	2	24.22145329	0	0	0	0	0	0	0	41	170	70	Male	1
0.661	7	2	32.45841266	2	0	2	0	0	1	0	42	179	104	Male	0
0.497	5	2	24.21875	1	0	0	0	1	0	1	62	160	62	Female	0
1	5	2	17.44492677	0	1	0	1	1	0	1	35	157	43	Female	0
1	6	2	26.3958034	0	0	1	1	1	0	0	52	173	79	Male	0
1	4	2	22.14532872	2	0	0	1	1	1	1	43	170	64	Male	1
0.768	5	2	23.1206236	1	0	0	1	0	1	1	54	174	70	Male	0
0.768	4	2	23.51020408	0	1	0	0	1	0	0	49	175	72	Male	1
1	6	2	19.82855312	0	0	0	0	1	1	0	35	158	49.5	Female	0
1	6	2	22.22906193	0	0	0	1	0	1	1	62	171	65	Male	0
1	6	2	18.85813149	0	0	0	1	0	1	0	45	170	54.5	Male	1
1	5	2	20.02884153	2	0	0	1	0	0	1	49	158	50	Female	0
1	5	2	19.20415225	1	0	0	1	1	1	1	29	170	55.5	Male	1
0.768	6	2	26.12244898	0	0	1	1	1	0	0	39	175	80	Male	0
1	7	2	20.76124568	0	0	0	0	1	0	1	35	170	60	Male	0
0.654	7	2	21.35991456	0	0	0	1	0	0	0	39	159	54	Female	0
0.768	7	2	25.78125	1	0	1	1	0	0	0	28	160	66	Female	1
1	6	2	27.17063157	0	0	1	1	1	0	0	49	182	90	Male	1
0.768	6	2	20.24489796	0	1	0	1	0	1	3	59	175	62	Male	1
0.768	4	2	28.04019722	0	0	1	1	0	1	4	47	163	74.5	Male	0
1	6	2	16.76573693	0	0	0	0	1	1	0	36	162	44	Female	1
0.732	4	2	22.85714286	1	0	0	0	1	1	0	41	175	70	Male	0
0.705	5	2	26.25958475	0	0	1	1	1	1	3	56	169	75	Male	0
0.768	7	2	21.46430503	0	0	0	1	1	1	1	48	172	63.5	Male	1
0.768	7	2	23.14814815	2	1	0	1	1	1	0	52	180	75	Male	0
0.768	7	2	16.60899654	0	1	0	1	1	0	1	29	170	48	Female	0
0.768	7	2	24.22145329	0	0	0	1	0	1	1	44	170	70	Male	0
1	7	2	19.22337563	2	0	0	1	1	0	0	57	153	45	Female	0
1	4	2	28.37370242	2	0	1	1	0	1	0	42	170	82	Male	0
0.768	7	2	21.87242282	0	0	0	1	1	1	0	56	167	61	Male	0
0.705	6	2	20.39542144	2	0	0	1	0	1	0	57	155	49	Female	0
1	5	2	18.64534404	0	0	0	1	0	1	1	32	167	52	Female	0
0.768	6	2	19.0447514	1	0	0	1	0	0	0	27	163	50.6	Female	0
0.768	7	2	26.89767019	0	0	1	1	0	1	0	46	159	68	Female	1
0.705	4	2	19.94805977	1	0	0	0	0	1	0	40	163	53	Male	0
0.705	6	2	17.20806666	2	0	0	1	0	1	0	51	182	57	Male	0
1	7	2	21.0498179	0	0	0	0	0	0	0	52	173	63	Male	0
0.768	6	2	25.77777778	2	0	1	1	0	0	0	56	150	58	Female	0
1	4	2	18.87066338	0	0	0	1	1	1	0	37	166	52	Male	0
0.768	6	2	21.383942	0	0	0	1	1	1	0	49	173	64	Male	0
1	5	2	29.96878252	0	0	1	0	1	1	0	38	155	72	Female	0
0.768	5	2	25.30693205	0	0	1	1	1	1	0	42	171	74	Male	0
1	7	2	21.9138057	0	0	0	0	0	1	0	28	185	75	Male	1
1	4	2	21.383942	0	0	0	1	0	0	0	64	173	64	Male	1
0.768	6	2	21.18328144	0	0	0	1	0	0	0	43	151	48.3	Female	1
0.768	7	2	20.76124568	1	0	0	1	0	0	0	51	170	60	Male	1
0.705	4	2	17.94181725	1	0	0	0	0	0	0	25	153	42	Female	1
1	7	2	23.58832922	0	0	0	1	0	0	0	54	166	65	Male	0
1	5	2	21.50446956	0	0	0	1	0	0	0	37	154	51	Female	0
1	7	2	20.17264027	0	0	0	1	0	0	0	23	146	43	Female	0
1	6	2	20.504934	1	0	0	1	1	0	0	39	153	48	Female	0
0.786	6	2	17.25838264	2	0	0	0	0	0	0	38	156	42	Female	1
1	7	2	21.97133586	1	1	0	0	0	0	0	47	172	65	Male	1
1	6	2	22.09317005	0	1	0	0	1	1	0	33	178	70	Male	0
1	6	2	23.68317179	0	1	0	1	1	0	0	56	151	54	Female	0
1	4	2	23.98375407	0	1	0	1	1	0	1	64	169	68.5	Male	1
1	5	2	23.14814815	0	0	0	0	0	1	0	28	180	75	Male	1
1	6	2	18.359375	0	0	0	1	0	0	1	51	160	47	Female	0
0.768	7	2	23.67125363	0	0	0	1	1	1	0	45	178	75	Male	1
1	5	2	22.05219018	0	0	0	1	1	1	1	31	173	66	Male	1
0.768	7	2	26.49302563	0	0	1	1	1	1	0	42	177	83	Male	0
0.724	5	2	20.79672989	0	0	0	1	0	1	0	34	167	58	Male	0
1	4	2	24.48979592	0	0	0	1	1	1	2	55	175	75	Male	0
1	4	2	23.1206236	0	1	0	1	0	1	0	26	174	70	Male	1
1	6	2	18.28677973	0	0	0	0	1	0	0	55	167	51	Female	0
0.768	7	2	20.90419501	0	0	0	1	0	0	0	56	168	59	Male	1
1	5	2	23.78121284	0	0	0	1	0	1	0	51	174	72	Male	1
1	7	2	18.19548277	1	0	0	1	1	0	1	28	159	46	Female	0
0.768	6	2	19.89911611	0	0	0	1	0	0	0	57	147	43	Female	1
1	4	2	19.59183674	0	0	0	1	1	0	0	33	175	60	Male	0
0.705	6	2	22.98539751	0	1	0	1	0	1	1	31	172	68	Male	1
1	6	2	19.48696145	0	0	0	0	0	1	0	35	168	55	Male	1
1	6	2	22.49134948	0	1	0	1	1	0	1	55	170	65	Male	0
1	5	2	20.66115703	0	0	0	0	1	0	1	63	154	49	Female	1
1	6	2	21.2962963	0	1	0	1	1	1	1	40	180	69	Male	0
1	4	2	18.36547291	0	0	0	1	1	1	0	36	165	50	Male	1
0.768	4	2	20.04744562	1	1	0	0	1	0	1	57	173	60	Male	1
1	6	2	16.60899654	0	0	0	1	1	0	0	31	170	48	Female	0
1	6	2	19.03114187	0	0	0	0	1	0	0	24	170	55	Male	0
0.768	7	2	22.49134948	0	0	0	1	1	1	0	53	170	65	Male	1
1	4	2	17.70857697	2	0	0	0	0	0	2	29	173	53	Female	1
1	6	2	27.70083103	0	0	1	1	1	0	0	37	152	64	Female	0
0.631	7	2	25.74826004	0	0	1	1	1	0	2	63	179	82.5	Male	0
0.768	4	2	23.12467037	0	0	0	0	0	0	0	56	157	57	Male	1
1	4	2	26.67487432	1	0	1	1	1	0	10	45	171	78	Male	0
1	6	2	27.33564014	2	0	1	1	0	1	0	50	170	79	Male	0
1	4	2	31.4453125	1	0	2	1	0	1	0	40	160	80.5	Female	0
1	5	2	24.23822715	0	0	0	1	1	0	0	54	152	56	Female	0
0.768	7	2	23.05175491	0	0	0	0	1	0	2	34	164	62	Male	0
0.768	6	2	19.13580247	0	0	0	1	1	1	0	46	180	62	Male	0
1	6	2	23.37472608	2	0	0	1	1	1	0	53	185	80	Male	1
1	7	2	21.97133586	2	0	0	0	1	1	0	37	172	65	Male	0
1	6	2	24.45196813	0	0	0	1	1	1	0	48	171	71.5	Male	0
1	6	2	18.5546875	0	0	0	0	0	0	2	54	160	47.5	Female	0
0.705	4	2	23.12467037	1	0	0	0	0	0	1	50	157	57	Female	1
0.705	5	2	21.36752137	1	0	0	0	0	1	0	46	156	52	Female	0
0.768	7	2	24.46029542	0	0	0	1	0	1	0	41	178	77.5	Male	0
1	4	2	23.183391	0	0	0	0	1	1	0	38	170	67	Male	0
1	5	2	26.75386445	0	1	1	1	1	1	0	46	174	81	Male	0
0.768	5	2	19.97918835	0	0	0	0	0	1	0	31	155	48	Female	0
1	5	2	29.90302875	0	0	1	1	1	0	0	36	153	70	Female	0
1	6	2	19.15119182	2	1	0	0	0	1	0	46	171	56	Male	0
1	4	2	17.578125	1	0	0	0	1	1	0	30	160	45	Female	0
0.768	6	2	22.03856749	1	0	0	0	1	0	0	49	165	60	Female	1
0.768	5	2	31.07354071	0	0	2	0	1	0	1	21	173	93	Male	1
1	5	2	27.70083103	0	0	1	1	1	0	0	37	152	64	Female	0
0.705	6	2	20.07774788	2	0	0	1	0	0	2	24	153	47	Female	1
1	5	2	22.37567995	1	0	0	1	1	1	2	51	161	58	Male	0
0.768	7	2	19.57992168	0	0	0	1	0	0	0	45	159	49.5	Female	1
0.786	6	2	22.22222222	0	1	0	1	1	1	0	38	180	72	Male	0
1	7	2	29.97245179	0	0	1	1	0	0	2	62	165	81.6	Male	0
1	7	2	20.74755019	0	1	0	1	1	1	1	27	177	65	Male	0
1	4	2	23.46069137	0	0	0	1	1	0	0	51	177	73.5	Male	1
1	4	2	23.828125	0	0	0	1	0	0	0	56	160	61	Male	0
0.768	6	2	25.30693205	0	0	1	1	1	1	0	53	171	74	Male	0
0.768	7	2	22.88221184	2	0	0	1	0	0	0	61	178	72.5	Male	1
0.768	7	2	22.53061225	2	0	0	1	0	1	3	50	175	69	Male	1
1	6	2	20.34279778	0	0	0	0	0	0	0	49	152	47	Female	0
1	6	2	23.48596221	2	1	0	1	1	0	0	38	167	65.5	Male	0
0.768	4	2	20.3125	0	0	0	0	1	1	0	48	160	52	Female	0
0.768	4	2	17.0392308	0	0	0	1	0	1	1	47	157	42	Female	0
0.768	6	2	25.71166208	0	0	1	0	0	1	0	54	165	70	Male	1
1	6	2	16.90102758	0	0	0	0	0	0	3	63	172	50	Female	1
1	4	2	22.30814991	0	1	0	1	1	1	1	53	164	60	Male	0
1	5	2	19.6282647	0	1	0	1	0	0	0	61	158	49	Female	0
1	7	2	18.44254582	0	0	0	1	1	0	0	42	163	49	Female	0
0.705	5	2	25.86451247	0	0	1	1	0	1	3	52	168	73	Male	1
1	7	2	21.2244898	0	1	0	0	0	1	25	56	175	65	Male	1
0.774	5	2	30.04081633	2	0	2	0	0	0	1	50	175	92	Male	0
0.768	7	2	23.87511478	0	0	0	1	1	0	0	29	165	65	Female	0
1	7	2	19.72318339	1	0	0	0	0	1	0	54	170	57	Female	0
1	6	2	24.1671624	0	0	0	1	1	1	1	51	164	65	Male	0
1	4	2	22.37441285	0	0	0	1	1	0	1	28	167	62.4	Female	0
1	7	2	20.79672989	0	0	0	0	1	1	2	39	167	58	Female	0
0.768	6	2	24.55535972	1	0	0	0	0	0	1	56	158	61.3	Male	1
1	6	2	21.56454491	0	0	0	1	1	1	0	50	164	58	Female	0
0.768	6	2	21.484375	0	0	0	1	0	0	1	51	160	55	Female	0
0.768	6	2	19.06771066	0	1	0	1	1	0	1	54	157	47	Female	0
1	4	2	27.54820937	0	0	1	1	0	1	0	52	165	75	Male	1
1	7	2	19.15708812	0	0	0	1	0	1	1	38	174	58	Male	0
1	5	2	24.24242424	0	0	0	1	1	1	0	50	165	66	Male	0
1	4	2	20.57142857	2	1	0	0	0	1	0	35	175	63	Male	1
0.705	7	2	18.81892431	0	0	0	1	1	0	0	59	163	50	Female	0
1	5	2	17.54309022	0	0	0	1	0	0	1	53	151	40	Female	1
0.768	5	2	18.28989483	0	0	0	1	1	0	0	62	162	48	Female	0
0.705	4	2	23.7259365	0	0	0	1	0	0	3	63	161	61.5	Male	1
0.786	6	2	21.33333333	2	0	0	0	1	1	0	26	150	48	Female	0
1	7	2	19.65056175	1	0	0	1	0	0	0	50	153	46	Female	0
0.768	5	2	19.23356075	0	1	0	0	1	0	0	46	166	53	Female	0
0.768	7	2	25.88757396	0	0	1	0	0	0	3	50	156	63	Female	1
1	4	2	21.484375	0	1	0	1	0	1	0	48	160	55	Male	0
0.768	6	2	21.75925926	0	1	0	1	1	1	0	35	180	70.5	Male	1
1	4	2	18.40134298	0	0	0	0	0	1	0	35	176	57	Male	0
1	6	2	24	1	0	0	0	0	0	1	64	150	54	Female	0
0.768	7	2	21.2244898	1	1	0	1	1	0	0	62	175	65	Male	1
0.533	7	2	20.83081753	0	1	0	1	1	1	2	51	182	69	Male	1
1	6	2	23.74948248	1	0	0	1	1	0	6	63	163	63.1	Male	1
0.768	6	2	25.390625	0	0	1	1	0	0	0	33	160	65	Female	0
0.768	7	2	23.49523688	0	0	0	1	1	0	2	62	153	55	Female	1
1	7	2	16.18443652	0	0	0	1	1	1	1	63	174	49	Male	1
0.768	7	2	18.90203813	2	0	0	0	0	0	2	28	156	46	Female	0
1	6	2	22.95547629	0	0	0	1	1	1	3	50	174	69.5	Male	0
1	7	2	21.55769155	0	0	0	1	1	0	1	29	159	54.5	Female	0
0.768	5	2	23.63371229	0	1	0	1	0	0	1	55	155.3	57	Female	0
1	5	2	22.91303307	0	0	0	0	0	1	0	52	171	67	Male	0
1	4	2	21.875	0	0	0	0	1	1	1	51	160	56	Male	0
1	7	2	26.02758248	0	0	1	0	0	0	4	49	172	77	Male	0
1	7	2	25.390625	1	0	1	1	0	0	3	60	160	65	Male	0
0.768	4	2	23.87543253	0	0	0	1	0	1	2	59	170	69	Male	0
1	4	2	20.93663912	0	0	0	1	0	1	2	25	165	57	Female	1
0.705	5	2	24.34175829	0	1	0	1	1	0	1	53	157	60	Female	1
0.73	4	2	18.12523512	0	0	0	1	1	1	1	51	171	53	Male	0
0.705	6	2	17.56965112	2	0	0	1	1	0	1	55	167	49	Female	0
0.473	7	2	21.96712018	1	0	0	0	0	0	4	48	168	62	Male	0
1	5	2	18.64534404	0	0	0	0	1	1	0	24	167	52	Female	0
0.705	7	2	32.52595156	2	0	2	1	0	1	6	49	170	94	Male	1
0.768	6	2	15.43209877	0	0	0	0	0	0	4	63	144	32	Female	1
0.768	6	2	23.83432142	2	0	0	1	1	0	4	57	158	59.5	Female	0
1	4	2	25.05930703	0	0	1	0	0	0	1	45	173	75	Male	1
1	4	2	17.3987363	0	0	0	1	1	0	2	40	181	57	Male	0
0.656	5	2	28.9340689	0	0	1	0	0	1	3	47	161	75	Female	0
1	5	2	28.37370242	0	0	1	1	0	0	1	56	170	82	Male	0
1	6	2	20.90419501	0	0	0	1	1	0	1	60	168	59	Male	0
0.654	6	2	25.1953125	0	0	1	0	0	0	2	59	160	64.5	Female	1
1	4	2	21.2585034	0	0	0	0	1	1	2	55	168	60	Male	0
0.768	6	2	26.08452085	0	0	1	1	1	0	5	35	169	74.5	Male	1
0.705	4	2	24.87812795	0	1	0	1	1	1	2	57	175.7	76.8	Male	0
0.705	6	2	14.94984568	0	0	0	0	0	0	4	63	144	31	Female	1
1	7	2	26.57312925	1	0	1	1	1	1	2	58	168	75	Male	0
1	7	2	31.14186851	1	0	2	1	1	0	4	49	170	90	Male	0
0.768	6	2	20.79672989	1	1	0	1	1	0	1	61	167	58	Male	0
1	4	2	19.36247266	0	0	0	1	1	1	3	38	167	54	Female	0
1	7	2	25.05930703	1	0	1	1	0	1	1	53	173	75	Male	0
1	4	2	26.2226847	0	0	1	1	0	0	1	50	155	63	Female	1
0.705	4	2	20.81165453	2	0	0	0	1	0	1	56	155	50	Female	0
1	4	2	27.6816609	0	0	1	1	1	1	3	49	170	80	Male	1
0.536	6	2	25.7963725	0	0	1	1	1	0	2	47	162	67.7	Female	0
0.786	7	2	23.78121284	2	0	0	0	0	0	1	46	174	72	Male	0
0.768	5	2	18.42653421	0	1	0	1	0	0	2	63	158	46	Female	0
1	5	2	25.25951557	0	1	1	1	0	0	1	45	170	73	Male	1
0.768	5	2	21.50446956	0	0	0	1	0	0	1	56	154	51	Female	0
1	4	2	23.03004535	0	0	0	1	1	1	0	32	168	65	Male	1
0.705	7	2	21.4248615	1	0	0	1	0	0	2	62	152	49.5	Female	0
0.768	4	2	20.24221453	0	0	0	1	0	0	0	45	170	58.5	Male	1
0.592	4	2	25.05930703	0	0	1	1	1	0	0	47	173	75	Male	1
0.705	4	2	20.44913742	2	0	0	1	1	0	3	39	164	55	Female	0
1	6	2	20.28479857	0	0	0	0	1	0	0	46	157	50	Female	1
0.768	4	2	23.19109462	0	1	0	1	1	0	3	51	154	55	Female	0
0.768	5	2	21.14197531	2	0	0	1	0	0	1	31	180	68.5	Male	1
1	6	2	18.13121943	0	0	0	1	0	0	2	48	154	43	Female	0
0.768	5	2	23.03004535	0	0	0	0	1	1	0	43	168	65	Male	0
1	4	2	19.22768787	0	1	0	1	1	0	0	53	158	48	Female	0
1	4	2	26.21882086	0	1	1	0	0	1	0	50	168	74	Male	0
0.768	4	2	23.67125363	0	1	0	1	1	1	1	61	178	75	Male	1
0.768	5	2	25.82644628	0	0	1	1	0	0	0	39	176	80	Male	1
0.649	4	2	18.28989483	0	0	0	0	1	1	1	35	162	48	Female	0
0.768	5	2	20.83081753	0	0	0	1	0	1	0	30	182	69	Male	1
0.768	5	2	24.34175829	0	0	0	1	1	0	0	48	157	60	Female	0
1	4	2	19.94321255	0	0	0	1	0	1	0	38	172	59	Male	0
0.724	4	2	22.22906193	1	1	0	0	0	1	2	44	171	65	Male	1
0.768	4	2	23.30905307	0	0	0	1	1	0	0	58	155	56	Male	0
1	4	2	24.1671624	1	0	0	1	0	0	0	35	164	65	Female	1
0.61	6	2	22.20408163	0	0	0	1	0	1	1	39	175	68	Male	1
1	7	2	18.80920625	0	0	0	1	1	1	0	38	171	55	Male	1
0.768	6	2	19.47340663	2	0	0	0	1	1	1	22	157	48	Female	0
0.705	4	2	19.47340663	2	0	0	1	0	0	3	54	157	48	Female	1
0.768	7	2	22.64086463	0	0	0	1	0	0	1	27	153	53	Female	0
0.705	7	2	25.23634033	1	0	1	0	1	0	0	35	158	63	Female	1
1	4	2	19.94805977	0	1	0	1	0	0	2	32	163	53	Female	1
0.768	5	2	24.72518293	0	1	0	0	1	0	0	34	173	74	Male	1
1	7	2	19.72103697	2	1	0	0	1	1	0	44	167	55	Male	1
1	4	2	20.51508648	2	1	0	0	1	1	0	28	178	65	Male	1
0.587	7	2	23.64758344	1	0	0	1	1	0	0	57	149	52.5	Female	0
1	7	2	23.4375	0	0	0	1	1	1	0	43	176	72.6	Male	0
1	4	2	26.81223718	2	0	1	0	0	1	1	52	161	69.5	Male	1
0.705	5	2	30.0432623	2	0	2	0	1	1	1	39	158	75	Male	0
0.768	7	2	21.50446956	0	0	0	0	1	0	0	51	154	51	Female	0
0.786	4	2	25.30864198	1	0	1	0	0	0	1	36	180	82	Male	0
0.768	5	2	23.95909423	0	0	0	0	1	0	1	62	185	82	Male	0
0.786	6	2	24.7265625	2	0	0	0	1	0	0	45	160	63.3	Female	1
0.786	7	2	19.03114187	1	0	0	0	0	0	0	42	170	55	Female	0
0.73	7	2	27.34375	0	0	1	1	0	0	3	64	160	70	Male	0
0.768	7	2	20.82999519	0	0	0	1	1	0	2	33	158	52	Female	0
0.587	6	2	18.5178041	1	0	0	1	0	0	1	44	161	48	Female	0
0.649	7	2	26.14927686	1	0	1	0	0	1	2	53	176	81	Male	1
0.768	5	2	22.94811575	0	0	0	0	1	1	1	28	167	64	Male	1
1	5	2	24.1671624	0	0	0	0	1	1	0	44	164	65	Female	0
0.768	7	2	23.18367347	0	1	0	1	1	0	0	52	175	71	Male	0
0.768	4	2	23.80540166	0	0	0	1	0	0	0	63	152	55	Female	0
1	6	2	19.8791026	0	1	0	1	0	0	1	53	157	49	Female	1
1	4	2	22.48132907	0	1	0	0	1	0	0	39	162	59	Female	0
0.768	4	2	25.71166208	0	0	1	1	0	0	0	29	165	70	Female	0
0.768	5	2	19.13265306	0	1	0	1	0	0	1	35	168	54	Female	1
1	5	2	20.2020202	0	1	0	0	0	0	1	23	165	55	Male	0
0.705	6	2	21.70792339	1	0	0	1	1	1	0	44	169	62	Male	0
1	5	2	22.98539751	0	1	0	0	1	1	2	42	172	68	Male	0
0.693	4	2	24.56747405	0	0	0	0	0	0	1	64	170	71	Male	0
1	6	2	19.14672216	1	0	0	1	1	0	0	56	155	46	Female	0
0.768	7	2	28.46648301	1	0	1	1	1	1	6	60	165	77.5	Male	1
0.693	5	2	26.7299275	0	0	1	1	0	1	1	46	173	80	Male	1
0.768	7	2	27.41445369	0	0	1	1	0	1	1	35	174	83	Male	1
0.705	7	2	20.39542144	2	0	0	1	1	1	3	48	155	49	Female	0
1	5	2	21.1552942	0	0	0	0	1	1	1	25	167	59	Female	0
0.705	6	2	26.57308613	1	1	1	1	0	0	3	64	157	65.5	Female	1
1	6	2	15.20381328	0	0	0	1	1	1	0	46	156	37	Female	1
0.768	6	2	21.45357371	0	0	0	0	1	1	2	52	163	57	Female	0
0.768	7	2	24.30248706	0	1	0	1	0	1	2	52	178	77	Male	1
1	5	2	21.37409801	0	0	0	1	0	0	3	62	171	62.5	Male	0
1	4	2	21.0076678	0	1	0	1	0	0	1	58	169	60	Female	0
0.693	5	2	28.00094518	1	0	1	1	1	0	4	62	184	94.8	Male	0
0.693	7	2	21.36752137	0	0	0	0	1	1	2	48	156	52	Male	0
1	7	2	27.1430375	1	0	1	1	0	1	0	41	178	86	Male	1
0.768	5	2	21.484375	0	1	0	0	0	0	0	48	160	55	Female	0
0.705	6	2	27.16049383	2	1	1	1	0	1	0	37	180	88	Male	0
0.587	6	2	20.42941836	2	0	0	1	1	0	0	42	158	51	Female	0
1	6	2	26.43807082	0	0	1	0	0	0	2	24	158	66	Female	0
1	6	2	22.77318641	0	0	0	0	1	0	0	23	165	62	Male	0
0.693	7	2	21.2183172	0	1	0	1	0	0	1	32	161	55	Female	0
1	6	2	18.13121943	0	0	0	1	1	1	0	45	154	43	Female	1
0.649	7	2	28.73174689	1	1	1	0	0	0	0	55	172	85	Male	0
0.768	6	2	19.13580247	2	0	0	0	1	1	0	48	180	62	Male	1
0.705	6	2	23.14814815	2	1	0	0	1	1	1	33	180	75	Male	1
0.774	5	2	24.77209671	0	0	0	1	0	1	2	56	174	75	Male	1
0.58	4	2	23.52941177	1	0	0	0	1	1	0	47	170	68	Male	1
0.768	4	2	22.74204029	0	1	0	1	1	1	0	54	171	66.5	Male	0
0.661	5	2	25.40281608	2	0	1	1	1	1	0	55	166	70	Male	1
0.768	5	2	23.91883029	0	0	0	1	1	0	0	51	161	62	Female	0
0.705	5	2	24.06404739	2	0	0	1	1	0	3	51	147	52	Female	0
0.705	6	2	22.20633069	2	0	0	1	0	0	0	54	163	59	Female	1
0.768	5	2	26.57312925	0	1	1	1	1	1	1	50	168	75	Male	1
0.786	5	2	18.5178041	0	0	0	0	1	1	0	36	161	48	Female	1
0.804	7	2	26.42356982	0	1	1	1	0	1	0	43	174	80	Male	0
0.58	4	2	24.5389649	0	0	0	1	1	0	2	62	164	66	Male	0
1	5	2	21.71806609	0	1	0	0	0	0	0	36	173	65	Male	1
0.705	6	2	24.09297052	1	0	0	1	1	0	0	51	168	68	Male	1
0.804	7	2	19.81767737	0	0	0	0	1	1	0	28	174	60	Male	0
0.786	4	2	26.03749399	2	0	1	0	0	0	0	25	158	65	Female	0
1	6	2	21.51385851	0	0	0	1	1	1	0	33	167	60	Male	0
1	7	2	27.1177686	0	0	1	1	1	1	0	34	176	84	Male	1
1	6	2	19.33372992	1	0	0	0	0	1	3	39	164	52	Female	1
1	5	2	20.07774788	0	0	0	1	1	0	1	62	153	47	Female	0
1	6	2	26.17383255	0	0	1	1	1	1	0	55	177	82	Male	1
1	5	2	19.25261962	0	0	0	1	1	1	0	35	178	61	Male	0
0.768	4	2	19.47714681	0	0	0	1	0	0	1	52	152	45	Female	0
1	4	2	23.22543185	0	0	0	1	0	0	0	53	166	64	Female	1
1	7	2	20.703125	0	1	0	0	1	0	1	45	160	53	Female	0
0.705	5	2	19.36247266	2	0	0	1	1	1	1	59	167	54	Female	1
0.768	6	2	23.71184463	0	1	0	1	0	1	0	31	163	63	Male	0
0.768	4	2	24.03460984	1	0	0	1	1	1	0	57	158	60	Female	0
0.705	5	2	21.2244898	2	0	0	1	0	1	1	50	175	65	Male	1
1	4	2	15.91710621	1	0	0	1	0	0	1	60	179	51	Male	1
0.768	4	2	30.91557669	0	0	2	1	1	1	1	55	174	93.6	Male	1
1	4	2	22.65625	0	0	0	1	1	0	0	52	160	58	Female	0
0.768	4	2	29.75778547	0	1	1	1	1	1	4	56	170	86	Male	0
1	6	2	30.18959063	0	0	2	0	1	0	1	59	182	100	Male	0
0.768	7	2	22.85289116	1	1	0	1	0	1	2	55	168	64.5	Male	0
1	6	2	26.12456747	0	1	1	0	0	0	0	37	170	75.5	Female	1
0.587	7	2	21.71806609	2	0	0	1	1	0	0	47	173	65	Male	1
0.768	7	2	26.36560303	0	0	1	1	1	1	0	38	172	78	Male	1
1	6	2	25.82644628	0	0	1	0	1	1	1	51	176	80	Male	0
1	6	2	22.03172569	0	0	0	0	1	0	0	49	158	55	Male	0
1	7	2	16.32653061	1	0	0	0	1	1	0	40	175	50	Male	0
0.768	6	2	25.46198063	0	0	1	1	1	0	3	44	161	66	Female	0
0.612	4	2	26.34649403	2	0	1	0	0	0	0	37	163	70	Male	1
1	4	2	24.22476587	0	0	0	1	1	0	1	56	155	58.2	Female	0
1	4	2	18.40134298	0	1	0	1	1	1	0	48	176	57	Male	0
1	5	2	23.24459454	1	0	0	1	1	0	0	56	151	53	Female	0
0.649	6	2	37.6184125	0	0	2	1	0	0	0	35	171	110	Male	1
0.768	6	2	23.1206236	1	0	0	1	0	1	0	39	174	70	Male	1
0.705	6	2	27.28174603	1	0	1	1	0	0	1	63	168	77	Male	0
1	4	2	27.34375	0	0	1	0	0	0	0	49	160	70	Male	0
0.693	4	2	20.19509221	0	0	0	0	0	1	0	51	162	53	Female	0
0.768	7	2	29.3877551	0	0	1	1	1	1	2	50	175	90	Male	1
0.768	6	2	25.25951557	0	0	1	0	1	0	1	29	170	73	Male	0
0.656	7	2	18.80920625	2	1	0	0	0	0	0	31	171	55	Male	1
0.693	6	2	27.23922448	0	1	1	0	0	0	3	62	158	68	Female	0
0.768	5	2	27.04164413	1	0	1	0	0	1	2	46	172	80	Male	0
0.649	7	2	28.76397107	1	0	1	1	1	0	0	51	156	70	Female	0
0.73	4	2	21.79930796	0	0	0	1	0	1	0	42	170	63	Male	1
1	6	2	29.41176471	0	0	1	1	1	1	0	29	170	85	Male	1
0.768	7	2	22.03856749	1	0	0	1	0	1	3	54	165	60	Male	0
0.768	6	2	25.21625331	2	0	1	1	1	1	0	47	177	79	Male	0
1	6	2	20.06095444	0	1	0	1	0	1	0	45	161	52	Female	0
0.786	5	2	20.08888889	2	1	0	0	1	1	6	52	150	45.2	Female	1
1	7	2	21.97133586	0	0	0	1	0	1	1	44	172	65	Male	1
1	6	2	18.25631872	0	0	0	1	0	1	1	49	157	45	Female	0
1	5	2	21.35991456	0	1	0	1	1	0	2	60	159	54	Female	0
1	7	2	19.44444444	0	0	0	1	0	1	0	34	180	63	Male	0
1	4	2	19.8791026	0	0	0	0	0	1	1	47	157	49	Female	1
1	6	2	20.04744562	2	0	0	1	1	1	2	43	173	60	Male	1
1	5	2	19.38214469	0	0	0	1	1	0	1	36	159	49	Female	0
1	4	2	24.32653061	2	0	0	1	1	1	3	57	175	74.5	Male	1
0.705	4	2	22.5308642	1	0	0	0	1	0	2	57	180	73	Male	0
0.533	7	2	25.30693205	2	1	1	0	0	0	1	61	171	74	Male	0
0.693	4	2	26.21882086	0	0	1	1	1	0	2	61	168	74	Male	1
0.705	5	2	20.70081674	2	0	0	1	0	1	3	63	163	55	Male	0
0.596	5	2	22.109375	0	0	0	1	1	0	7	60	160	56.6	Male	0
0.587	6	2	32.40740741	2	0	2	1	1	0	0	50	180	105	Male	0
0.536	4	2	23.14049587	0	0	0	1	0	0	0	56	165	63	Male	0
0.768	4	2	28.24767562	0	0	1	1	0	1	0	44	176	87.5	Male	1
0.768	5	2	28.08901096	2	0	1	0	1	1	0	31	179	90	Male	0
0.536	4	2	23.50780533	0	0	0	1	1	0	0	60	165	64	Male	1
0.768	4	2	20.79672989	2	0	0	0	1	1	1	51	167	58	Female	0
1	4	2	25.24933721	1	0	1	1	1	1	1	38	178	80	Male	0
1	7	2	20.80856124	0	1	0	0	1	0	0	60	174	63	Male	0
0.473	6	2	19.42797629	0	0	0	0	0	0	3	62	158	48.5	Female	1
0.768	5	2	22.58270917	2	0	0	0	1	1	0	39	163	60	Female	0
1	4	2	24.99890356	2	0	0	1	0	0	0	51	151	57	Female	1
0.768	5	2	23.50780533	0	0	0	1	0	1	2	46	165	64	Male	1
1	6	2	28.31020408	0	1	1	1	0	1	0	39	175	86.7	Male	1
0.768	5	2	18.06972789	0	0	0	0	0	0	0	56	168	51	Male	1
0.768	5	2	18.28989483	2	0	0	1	1	0	2	59	162	48	Female	0
0.768	5	2	25.88057064	0	1	1	0	1	1	0	33	178	82	Male	0
1	6	2	22.86236854	0	0	0	1	1	1	0	48	162	60	Female	0
0.705	6	2	26.22222222	0	1	1	1	1	0	0	43	150	59	Female	0
0.774	5	2	23.87511478	1	0	0	1	0	1	0	48	165	65	Male	0
1	6	2	22.98539751	0	0	0	1	1	1	1	46	172	68	Male	1
0.768	7	2	28.56273661	0	0	1	1	1	1	0	42	172	84.5	Male	0
0.768	5	2	20.56880661	0	0	0	1	1	0	0	51	159	52	Female	0
0.768	6	2	23.98687035	0	0	0	1	0	1	2	56	178	76	Male	0
0.768	7	2	22.23098713	0	0	0	1	1	1	0	46	167	62	Male	1
1	7	2	21.26538447	0	1	0	0	1	1	0	41	163	56.5	Female	0
0.768	6	2	29.666548	0	0	1	1	1	0	0	57	159	75	Female	0
1	5	2	27.75510204	0	0	1	1	0	0	1	41	175	85	Male	1
1	6	2	20.18730489	0	0	0	1	0	0	0	53	155	48.5	Female	0
0.768	6	2	24.88329926	1	1	0	1	1	0	0	49	161	64.5	Female	0
0.705	6	2	17.32380159	0	0	0	1	0	0	1	59	151	39.5	Female	0
1	4	2	21.50188649	0	0	0	0	1	1	1	38	157	53	Female	0
0.693	4	2	29.77777778	0	0	1	0	1	0	3	62	150	67	Female	0
0.768	7	2	32.07591299	0	0	2	1	0	1	3	42	173	96	Male	1
0.654	6	2	21.2244898	0	1	0	1	1	1	2	56	175	65	Male	0
0.768	5	2	26.57312925	1	0	1	1	1	1	2	52	168	75	Male	0
0.786	7	2	23.87279852	1	0	0	1	1	0	5	45	149	53	Female	0
1	4	2	21.12097304	0	1	0	0	0	0	1	60	156	51.4	Female	0
0.768	6	2	23.20580957	0	0	0	0	1	0	1	58	157	57.2	Female	1
1	7	2	31.90311419	0	1	2	1	0	0	4	61	170	92.2	Male	0
1	7	2	30.09143166	2	0	2	0	0	1	4	45	161	78	Male	0
0.693	5	2	25.51020408	0	1	1	1	0	1	5	61	168	72	Male	0
1	4	2	26.6727633	0	0	1	1	0	0	4	62	162	70	Female	0
0.693	6	2	22.50692521	1	0	0	0	1	1	1	37	152	52	Female	0
0.587	6	2	31.95763331	0	1	2	0	0	0	5	64	148	70	Female	0
0.768	7	2	20.24489796	0	0	0	1	1	1	0	32	175	62	Male	0
1	5	2	18.66666667	0	0	0	0	1	0	1	60	150	42	Female	0
0.768	4	2	23.12467037	0	0	0	1	1	0	1	54	157	57	Female	0
1	7	2	32.79194476	1	0	2	0	0	1	3	53	161	85	Female	0
0.587	5	2	22.58270917	0	0	0	1	1	1	2	57	163	60	Male	0
0.536	7	2	22.91303307	0	0	0	0	0	0	0	57	171	67	Male	1
0.768	7	2	19.22768787	0	0	0	1	0	0	0	48	158	48	Female	1
0.649	6	2	24.81632653	1	0	0	0	0	0	1	29	175	76	Male	0
0.768	6	2	20.51508648	0	0	0	1	0	1	0	32	178	65	Male	1
0.482	6	2	24.48979592	0	0	0	1	1	1	3	44	175	75	Male	1
0.768	5	2	23.183391	1	0	0	1	1	0	1	57	170	67	Female	0
0.768	6	2	18.71804237	0	0	0	0	0	0	0	61	148	41	Female	1
0.768	5	2	20.67901235	0	0	0	1	0	1	0	38	180	67	Male	1
0.649	6	2	21.36752137	1	0	0	0	0	0	3	60	156	52	Female	1
1	4	2	18.44254582	0	0	0	0	0	1	0	34	163	49	Female	0
1	5	2	25.56610665	0	0	1	0	1	1	0	31	148	56	Female	0
0.768	5	2	21.13885586	0	1	0	1	1	1	1	52	174	64	Male	0
1	5	2	20.76124568	0	0	0	0	1	0	1	24	170	60	Male	1
0.58	4	2	27.51338489	2	1	1	1	1	0	3	45	164	74	Female	0
0.724	4	2	18.97453196	0	0	0	0	1	0	1	33	154	45	Female	0
0.693	6	2	27.43484225	0	1	1	1	0	0	1	52	162	72	Male	0
0.517	5	2	28.76397107	2	0	1	1	1	1	0	55	156	70	Female	0
0.631	7	2	29.64487121	2	0	1	0	0	1	1	49	162	77.8	Female	0
0.724	4	2	22.67995241	2	1	0	0	0	0	1	50	164	61	Male	1
0.768	5	2	26.12244898	1	0	1	1	1	0	2	61	175	80	Male	0
0.768	6	2	18.44254582	2	0	0	0	1	1	0	27	163	49	Female	0
0.768	7	2	23.94636015	1	0	0	0	1	0	1	53	174	72.5	Male	1
0.631	7	2	24.56320219	1	0	0	1	0	1	3	53	153	57.5	Female	0
0.768	7	2	16.23307275	0	0	0	0	1	0	3	58	153	38	Female	0
0.768	4	2	21.50188649	2	0	0	1	1	1	1	43	157	53	Female	0
0.768	7	2	35.49326378	0	0	2	0	0	1	1	24	150.6	80.5	Female	1
0.768	6	2	21.97133586	1	0	0	1	1	1	0	58	172	65	Male	1
1	7	2	21.77384236	0	0	0	1	1	0	2	54	166	60	Female	0
0.768	4	2	19.31295201	0	1	0	1	0	0	0	47	156	47	Female	0
0.768	5	2	36.48484303	1	0	2	0	0	0	2	63	149	81	Female	0
0.768	5	2	21.67125804	0	1	0	1	0	1	0	61	165	59	Male	1
0.786	5	2	22.85714286	0	0	0	1	1	0	0	44	175	70	Male	0
0.774	4	2	41.95479845	1	0	2	0	0	0	3	58	154	99.5	Male	1
0.693	7	2	36.62851197	0	0	2	1	0	0	1	46	155	88	Female	1
0.693	7	2	28.71972318	0	0	1	1	0	0	4	55	170	83	Male	0
1	4	2	19.53125	0	0	0	0	0	0	1	54	160	50	Female	1
0.649	5	2	28.5075216	0	0	1	1	0	0	1	54	151	65	Female	1
0.58	4	2	18.28989483	0	0	0	1	0	0	2	59	162	48	Female	1
0.768	5	2	18.56399584	0	0	0	1	0	0	7	54	155	44.6	Female	0
0.768	6	2	26.62993572	0	0	1	1	1	1	2	64	165	72.5	Male	0
0.768	4	2	25.2825699	0	0	1	0	0	0	2	62	164	68	Female	0
1	5	2	22.20633069	2	1	0	1	0	0	3	61	163	59	Male	0
0.587	6	2	26.61934339	2	0	1	1	0	0	10	63	161	69	Male	0
0.705	6	2	18.36900338	0	0	0	0	1	0	1	25	153	43	Female	0
0.693	6	2	20.42941836	0	0	0	1	0	0	3	60	158	51	Female	0
0.768	4	2	25.390625	0	0	1	0	0	0	1	45	160	65	Female	0
0.705	5	2	24.03460984	0	0	0	1	1	0	1	53	158	60	Female	0
0.768	7	2	21.2183172	0	0	0	0	0	1	0	44	161	55	Male	0
1	4	2	24.67550027	0	1	0	0	1	0	2	62	172	73	Male	0
0.768	5	2	23.52858794	0	0	0	1	1	0	2	49	169	67.2	Female	0
0.693	6	2	30.48665738	0	0	2	0	0	1	3	51	163	81	Female	0
0.768	5	2	14.6484375	1	0	0	1	0	0	1	57	160	37.5	Female	1
0.768	7	2	25.15555556	0	0	1	1	0	0	3	53	150	56.6	Female	0
0.786	6	2	18.25631872	2	1	0	0	1	1	0	47	157	45	Female	0
1	4	2	20.07842077	1	0	0	0	0	0	0	20	172	59.4	Male	0
0.705	4	2	22.40587695	0	0	0	0	1	1	1	33	165	61	Male	0
0.693	6	2	21.71925011	0	0	0	1	0	0	5	52	162	57	Female	0
0.473	6	2	27.05515088	0	0	1	1	0	1	4	64	155	65	Male	1
0.768	7	2	19.55017301	0	1	0	1	0	0	0	62	170	56.5	Male	0
0.768	7	2	18.73048907	2	0	0	1	1	1	2	62	155	45	Female	0
0.768	7	2	19.13265306	0	0	0	0	0	0	4	44	168	54	Female	0
0.768	5	2	21.63114885	0	0	0	1	0	0	0	50	158	54	Female	0
0.724	4	2	21.77384236	0	0	0	0	0	1	1	44	166	60	Male	0
0.631	6	2	22.67995241	1	1	0	0	1	0	2	57	164	61	Female	1
0.768	7	2	19.48696145	2	0	0	0	1	0	0	61	168	55	Male	1
0.661	6	2	16.76573693	1	0	0	0	0	1	0	56	162	44	Female	1
0.768	5	2	19.18436771	1	0	0	0	1	1	1	54	159	48.5	Female	1
0.724	4	2	19.47340663	0	0	0	0	0	1	2	47	157	48	Female	0
0.654	6	2	29.0687733	0	0	1	1	1	1	1	64	171	85	Male	1
0.768	7	2	27.47562949	0	0	1	1	1	1	2	54	163	73	Male	0
0.649	4	2	35.44536272	0	0	2	0	0	0	3	62	165	96.5	Male	0
0.768	4	2	22.43230252	0	0	0	1	0	0	1	60	158	56	Female	1
0.705	7	2	22.65625	1	0	0	1	1	0	1	54	160	58	Female	1
1	5	2	23.80869017	2	0	0	1	0	1	7	58	169	68	Male	1
0.494	5	2	25.25951557	0	0	1	1	0	1	0	46	170	73	Male	1
0.786	4	2	23.72281065	2	1	0	0	1	0	0	44	173	71	Male	0
0.724	4	2	22.47658689	0	0	0	1	1	0	0	50	155	54	Female	0
0.768	4	2	23.80869017	0	0	0	1	0	1	3	60	169	68	Male	1
0.768	7	2	22.49134948	0	1	0	1	1	1	1	55	170	65	Male	0
1	4	2	22.03856749	0	1	0	1	1	0	0	64	165	60	Male	0
0.768	7	2	32.46618106	0	0	2	1	1	0	2	50	155	78	Female	0
1	6	2	21.2585034	0	0	0	0	1	1	0	37	168	60	Male	1
0.768	7	2	27.33277956	0	1	1	0	0	0	4	53	159	69.1	Female	0
1	5	2	29.98358793	0	1	1	0	0	0	2	54	178	95	Male	1
0.483	6	2	20.54419284	2	0	0	0	0	0	2	55	148	45	Female	0
0.483	4	2	32.8125	1	0	2	1	0	0	2	47	160	84	Female	0
0.705	7	2	19.22768787	2	0	0	0	0	1	1	51	158	48	Female	1
0.768	6	2	23.38435374	1	0	0	1	1	1	0	62	168	66	Male	1
0.768	7	2	18.66201469	0	0	0	0	0	0	1	51	157	46	Female	1
1	4	2	22.38631428	0	1	0	0	1	0	2	35	173	67	Male	1
0.768	5	2	20.76124568	0	0	0	1	0	1	0	29	170	60	Female	1
1	6	2	24.22145329	0	1	0	1	1	1	2	28	170	70	Male	1
0.533	7	2	17.84651993	1	0	0	1	1	1	1	55	164	48	Male	0
0.768	5	2	21.91358025	1	0	0	1	0	0	0	43	180	71	Male	0
0.786	5	2	19.10204082	2	0	0	0	0	1	1	36	175	58.5	Male	0
1	6	2	21.30394858	0	0	0	0	1	0	0	20	165	58	Male	0
0.724	5	2	34.60207613	2	0	2	0	1	0	14	23	170	100	Male	0
1	4	2	24.96494648	0	0	0	1	1	1	1	34	171	73	Male	1
0.565	6	2	17.44492677	1	0	0	0	1	1	0	25	157	43	Female	0
0.768	6	2	19.00390835	0	0	0	1	0	0	0	37	167	53	Female	0
0.786	7	2	20.89334253	0	0	0	0	1	1	1	31	157	51.5	Female	0
0.705	5	2	19.37716263	2	0	0	1	1	1	0	38	170	56	Male	1
0.768	6	2	22.03856749	2	1	0	1	1	1	0	42	165	60	Male	1
1	4	2	24.11403803	0	0	0	1	1	1	0	28	181	79	Male	1
0.768	7	2	25.28010986	1	0	1	1	1	1	0	37	179	81	Male	0
0.768	5	2	20.81165453	0	0	0	1	0	0	3	63	155	50	Female	0
0.736	7	2	15.40123457	2	1	0	0	1	1	1	27	180	49.9	Male	0
0.661	5	2	23.1206236	2	1	0	1	0	0	1	45	174	70	Male	0
1	5	2	24.81632653	0	0	0	1	1	1	2	50	175	76	Male	0
0.661	7	2	22.5981405	1	0	0	1	1	0	0	38	176	70	Male	1
0.656	6	2	17.06555671	2	0	0	1	1	0	1	31	155	41	Female	0
0.742	6	2	23.87543253	2	0	0	0	1	0	0	45	170	69	Male	0
0.786	7	2	27.96801606	2	0	1	1	1	1	0	42	167	78	Male	0
1	5	2	30.85320992	1	1	2	0	1	0	2	54	159	78	Female	0
0.786	4	2	23.95122659	2	0	0	1	1	1	1	57	166	66	Male	0
0.786	7	2	17.60477285	2	0	0	0	0	0	0	43	143	36	Female	1
1	4	2	20.2020202	1	1	0	0	1	1	1	31	165	55	Male	1
0.711	5	2	29.00059488	0	0	1	1	0	0	0	53	164	78	Female	0
0.786	7	2	22.58270917	1	0	0	0	0	0	0	48	163	60	Male	0
0.444	4	2	16	1	0	0	0	0	0	2	25	175	49	Male	1
0.661	4	2	22.40005472	2	0	0	1	0	0	1	45	171	65.5	Male	0
1	4	2	24.33747972	0	0	0	0	1	1	1	33	172	72	Male	0
0.705	4	2	21.51385851	0	1	0	1	0	0	2	61	167	60	Male	0
1	7	2	23.87511478	2	0	0	0	1	1	0	37	165	65	Male	0
1	7	2	20.71625344	0	0	0	0	1	0	0	50	165	56.4	Female	0
0.742	5	2	20.2020202	0	0	0	1	1	0	0	39	165	55	Male	0
0.498	5	2	23.42355741	2	0	0	0	1	0	2	26	164	63	Female	0
1	7	2	16.12469766	0	0	0	0	1	0	2	32	183	54	Male	0
0.705	5	2	22.39229025	1	1	0	0	1	0	2	60	168	63.2	Male	0
0.587	6	2	17.55333513	2	1	0	0	0	0	0	49	161	45.5	Female	1
1	4	2	22.49134948	1	0	0	1	0	0	0	46	170	65	Male	1
0.705	6	2	22.58270917	2	0	0	0	0	0	0	37	163	60	Female	0
0.786	5	2	14.53488372	2	0	0	0	1	1	0	54	172	43	Male	1
0.768	4	2	27.34375	0	1	1	1	1	0	0	63	160	70	Male	0
0.768	6	2	27.75510204	0	0	1	1	0	1	2	55	175	85	Male	1
0.705	7	2	20.95717116	1	0	0	0	0	1	0	63	162	55	Female	1
0.786	4	2	25.77854671	2	0	1	0	1	0	0	57	170	74.5	Male	1
1	4	2	26.63891779	0	0	1	1	1	1	1	35	155	64	Female	0
1	4	2	21.63114885	1	0	0	0	1	0	1	53	158	54	Male	1
0.768	6	2	25.03429355	0	0	1	1	0	0	3	56	162	65.7	Female	0
0.705	6	2	30.11099051	0	0	2	0	0	0	1	22	169	86	Male	0
1	5	2	22.90657439	0	0	0	1	0	1	0	35	170	66.2	Male	1
0.768	7	2	21.63331531	1	0	0	0	1	0	0	49	172	64	Male	1
1	7	2	21.91358025	2	0	0	1	0	1	2	47	180	71	Male	0
0.592	4	2	26.34649403	1	1	1	0	0	0	5	37	163	70	Male	1
0.724	5	2	34.72088268	2	0	2	1	0	0	2	48	161	90	Female	1
0.654	5	2	20.63963582	0	0	0	0	1	1	0	26	161	53.5	Female	0
1	6	2	20.76124568	2	1	0	0	1	1	1	26	170	60	Male	0
0.736	5	2	20.3125	2	0	0	1	0	1	0	37	160	52	Female	0
0.497	7	2	40.0390625	1	0	2	1	0	0	3	60	160	102.5	Female	0
0.587	4	2	23.5042735	1	0	0	0	1	0	2	23	156	57.2	Female	0
1	4	2	16.13770845	2	0	0	1	0	0	0	37	143	33	Female	0
0.688	6	2	19.921875	1	1	0	0	0	0	0	26	160	51	Male	0
1	10	3	21.71806609	2	1	0	0	1	1	1	51	173	65	Male	1
1	8	3	22.5073046	0	0	0	0	0	1	5	42	148	49.3	Female	1
0.705	8	3	21.22788762	2	0	0	0	1	1	0	23	155	51	Female	1
1	9	3	22.77623884	1	0	0	0	1	1	0	35	171	66.6	Male	0
1	10	3	20.51913409	0	0	0	1	1	1	1	45	171	60	Male	0
0.548	10	3	29.7210791	1	0	1	1	0	1	0	48	162	78	Male	1
0.768	8	3	24.91349481	1	0	0	1	0	0	0	56	170	72	Male	0
1	9	3	20.47826661	1	0	0	1	1	1	2	56	174	62	Male	1
0.631	11	3	31.0137051	1	0	2	0	0	1	0	37	184	105	Male	1
1	8	3	22.4996371	0	0	0	0	0	1	1	51	166	62	Male	0
1	8	3	18.30576947	1	0	0	0	1	0	1	37	178	58	Male	0
0.693	9	3	31.99217133	1	0	2	0	1	1	1	46	163	85	Male	0
0.768	8	3	23.23345618	0	0	0	0	1	0	0	57	158	58	Female	1
1	8	3	24.97704316	0	0	0	1	0	0	2	64	165	68	Male	0
0.768	8	3	29.05475207	0	0	1	1	0	0	1	58	176	90	Male	1
1	9	3	22.88221184	0	1	0	1	0	0	0	48	178	72.5	Male	1
1	9	3	23.7332384	1	0	0	0	0	1	1	41	159	60	Female	1
1	9	3	24.41827061	2	0	0	1	0	1	0	59	177	76.5	Male	0
0.768	11	3	17.44016649	0	0	0	1	1	0	2	36	155	41.9	Female	0
0.705	8	3	27.23922448	2	0	1	0	0	0	0	34	158	68	Female	0
0.542	11	3	27.34375	2	1	1	0	0	1	0	46	160	70	Male	0
0.786	11	3	23.66143862	2	1	0	1	1	1	0	39	172	70	Male	1
0.768	9	3	20.71569381	0	0	0	0	0	1	0	34	173	62	Male	1
0.786	8	3	17.7154195	2	0	0	0	1	1	0	38	168	50	Male	0
0.768	11	3	32.11195241	1	0	2	1	1	1	0	53	172	95	Male	0
0.786	8	3	26.36560303	2	0	1	1	1	1	1	47	172	78	Male	0
0.705	10	3	23.38868656	2	0	0	0	0	0	3	36	173	70	Male	0
0.768	9	3	22.98539751	0	0	0	1	1	1	0	53	172	68	Male	0
0.656	10	3	26.09509172	2	0	1	0	0	1	1	29	173	78.1	Male	0
0.724	11	3	17.44492677	0	0	0	1	0	0	2	49	157	43	Female	1
0.768	9	3	23.14814815	1	0	0	0	0	0	4	61	180	75	Male	0
0.592	10	3	17.15626204	1	0	0	0	0	0	1	28	169	49	Male	0
0.705	9	3	22.88888889	0	0	0	0	0	0	0	38	150	51.5	Female	1
0.705	9	3	29.70041322	2	0	1	0	0	0	0	39	176	92	Male	0
0.705	8	3	18.49489796	1	0	0	0	1	0	0	34	168	52.2	Female	0
1	10	3	21.61281179	1	1	0	1	0	1	0	39	168	61	Male	1
0.768	10	3	20.76124568	1	0	0	0	1	1	0	37	170	60	Male	1
0.768	8	3	27.96959994	0	0	1	1	1	0	1	27	161	72.5	Female	0
0.587	11	3	19.01439759	2	0	0	1	0	0	0	53	171	55.6	Male	1
0.533	10	3	19.03673469	2	0	0	0	0	0	1	39	175	58.3	Male	1
0.768	10	3	26.47918189	0	0	1	1	0	1	3	43	148	58	Female	0
0.705	11	3	23.10843458	2	1	0	1	0	1	0	34	169	66	Male	1
0.768	8	3	22.48198214	0	0	0	0	0	1	0	59	167	62.7	Male	1
1	10	3	32	0	0	2	1	0	1	4	60	175	98	Male	1
0.768	8	3	21.03806228	1	0	0	0	0	0	0	37	170	60.8	Male	0
0.705	9	3	21.55103349	1	0	0	1	0	0	0	49	158	53.8	Female	0
1	8	3	20.0749235	2	0	0	0	1	1	2	28	187	70.2	Male	0
1	11	3	20.43816559	0	1	0	0	1	0	0	42	167	57	Male	0
0.768	9	3	21.09375	0	0	0	1	0	0	0	50	160	54	Female	0
1	10	3	23.30668005	2	0	0	1	0	1	0	42	167	65	Female	0
0.768	8	3	19.14672216	0	0	0	0	1	1	2	29	155	46	Female	0
0.768	9	3	26.19618735	0	0	1	1	0	1	1	35	178	83	Male	1
0.705	10	3	22.40587695	2	0	0	0	1	1	0	42	165	61	Male	0
1	9	3	28.65013774	0	0	1	1	0	1	1	39	165	78	Male	1
1	10	3	21.96712018	1	0	0	1	0	1	0	48	168	62	Male	1
0.649	9	3	23.23765616	0	1	0	1	1	1	0	58	164	62.5	Male	0
0.768	9	3	21.09375	0	1	0	1	0	1	0	57	160	54	Female	0
1	8	3	28.30385016	1	0	1	1	1	0	0	49	155	68	Female	0
0.786	9	3	20.82093992	0	1	0	0	1	1	0	26	164	56	Male	0
1	10	3	29.67494522	0	0	1	1	0	0	0	28	148	65	Female	1
0.705	9	3	19.14672216	2	1	0	1	1	0	0	55	155	46	Female	0
0.705	8	3	18.93877551	2	0	0	1	1	1	0	33	175	58	Male	0
0.768	8	3	21.90758246	0	0	0	1	0	0	1	64	157	54	Female	0
0.768	8	3	19.46740129	0	0	0	1	1	1	0	46	165	53	Female	0
0.768	9	3	19.72318339	0	0	0	1	0	1	0	55	170	57	Male	0
0.724	9	3	22.77318641	0	1	0	1	0	0	0	53	165	62	Male	1
0.396	10	3	25.12110727	0	0	1	0	0	0	0	35	170	72.6	Male	0
1	9	3	19.53125	1	0	0	1	0	1	2	46	160	50	Female	0
0.705	10	3	22.03856749	2	1	0	1	0	0	0	59	165	60	Male	1
0.631	11	3	16.44736842	2	0	0	1	1	0	0	46	152	38	Female	0
0.768	9	3	25.21625331	0	0	1	0	0	1	0	51	177	79	Male	0
0.768	9	3	23.30668005	1	0	0	1	0	0	0	58	167	65	Male	1
1	8	3	16.01993592	2	0	0	0	0	1	1	57	159	40.5	Female	0
0.631	10	3	20.3125	0	0	0	1	0	0	1	54	160	52	Female	0
0.649	8	3	21.60493827	0	0	0	0	0	0	0	28	180	70	Male	0
0.693	8	3	29.13631634	0	0	1	1	0	0	0	51	155	70	Female	1
0.705	10	3	17.44492677	2	0	0	0	0	0	0	44	157	43	Female	1
1	9	3	19.31295201	2	0	0	1	0	0	1	32	156	47	Female	0
0.736	8	3	18.04270106	2	0	0	0	0	0	2	28	173	54	Male	0
1	8	3	28.84153181	0	0	1	1	1	1	0	53	158	72	Male	0
0.768	10	3	24.67550027	0	1	0	1	1	1	0	57	172	73	Male	0
1	10	3	19.53125	0	1	0	0	1	1	0	32	160	50	Female	0
0.587	9	3	17.4817898	0	0	0	0	1	0	1	55	155	42	Female	1
0.705	9	3	22.94213045	0	1	0	1	0	0	0	46	159	58	Female	0
1	8	3	20.07960128	0	0	0	1	1	0	0	62	167	56	Male	0
0.705	8	3	25.01352082	0	1	1	0	0	0	0	28	172	74	Male	0
1	10	3	22.76146754	0	0	0	1	1	0	0	34	161	59	Female	0
0.768	11	3	27.30996814	1	0	1	1	1	1	0	55	169	78	Female	1
0.768	9	3	19.90817264	1	0	0	0	1	1	0	45	165	54.2	Male	0
1	10	3	22.43230252	1	0	0	0	0	0	0	24	158	56	Female	1
0.768	9	3	22.65326844	0	1	0	0	1	0	0	52	169	64.7	Male	0
1	8	3	39.5421436	0	0	2	0	0	0	0	33	155	95	Female	0
1	9	3	23.52941177	0	1	0	1	1	1	2	57	170	68	Male	1
0.705	11	3	17.578125	0	0	0	0	0	0	1	47	160	45	Female	0
1	8	3	19.97918835	1	0	0	1	0	0	0	46	155	48	Female	0
0.786	8	3	22.23098713	2	0	0	1	0	1	0	38	167	62	Male	0
1	8	3	24.77209671	1	0	0	0	1	0	0	26	174	75	Male	0
1	11	3	20.95717116	0	0	0	1	1	0	0	39	162	55	Female	0
0.58	8	3	23.63236962	0	1	0	1	1	0	0	54	168	66.7	Male	0
0.705	10	3	24.09297052	0	0	0	0	0	0	0	45	168	68	Female	1
0.705	11	3	21.8299522	2	0	0	1	1	0	1	45	163	58	Female	1
0.705	9	3	25.25499642	1	1	1	1	1	0	1	60	163	67.1	Male	0
0.705	11	3	17.1875	0	1	0	0	0	0	0	37	160	44	Female	0
1	11	3	18.5178041	0	0	0	1	1	0	0	40	161	48	Female	0
0.693	9	3	21.79930796	0	0	0	1	1	1	0	53	170	63	Male	1
1	8	3	22.60026299	0	0	0	1	0	0	0	63	156	55	Female	0
1	10	3	17.84651993	0	0	0	0	1	1	2	50	164	48	Female	0
0.768	10	3	22.43230252	0	1	0	1	0	1	3	58	158	56	Female	0
0.768	9	3	21.12653061	1	0	0	1	0	1	2	58	175	64.7	Male	1
0.705	10	3	21.36752137	1	0	0	1	1	0	0	43	156	52	Female	1
0.705	11	3	18.55677322	1	0	0	1	0	1	0	33	169	53	Male	1
0.768	8	3	20.38561195	1	0	0	1	1	0	4	62	162	53.5	Female	0
0.768	9	3	18.66201469	1	0	0	0	0	1	0	55	157	46	Female	1
0.768	8	3	19.1953028	0	0	0	1	0	0	1	28	163	51	Female	1
0.705	11	3	20.57142857	2	0	0	1	1	1	0	37	175	63	Male	0
1	10	3	21.50188649	0	1	0	0	0	0	0	62	157	53	Female	0
1	9	3	16.65972512	1	0	0	1	0	0	2	28	147	36	Female	0
0.705	10	3	20.93663912	2	0	0	0	1	0	0	25	165	57	Male	0
0.705	8	3	20.54988662	1	1	0	0	1	1	0	25	168	58	Male	1
0.768	10	3	26.34649403	1	0	1	1	1	0	0	61	163	70	Male	1
0.711	11	3	23.14049587	1	0	0	0	0	0	0	44	165	63	Male	1
1	10	3	24.81096408	0	0	0	0	0	0	0	41	184	84	Male	1
0.768	8	3	21.88707637	0	1	0	0	0	1	0	37	171	64	Male	1
0.768	10	3	24.0218144	0	1	0	1	1	0	0	63	152	55.5	Female	0
0.768	9	3	25.25951557	2	0	1	0	0	0	1	50	170	73	Male	0
0.768	8	3	23.72281065	0	0	0	1	1	1	15	51	173	71	Male	1
0.587	9	3	19.81405274	2	0	0	1	0	1	1	28	162	52	Female	0
1	9	3	28.08899103	1	0	1	1	1	0	0	59	177	88	Male	0
1	10	3	17.63265306	2	0	0	0	1	0	0	31	175	54	Male	1
0.768	10	3	21.2183172	0	0	0	1	1	0	1	37	161	55	Female	0
0.768	9	3	17.99307959	0	0	0	0	1	1	1	36	170	52	Male	0
0.768	11	3	16.86625063	0	1	0	0	0	0	0	57	154	40	Female	0
0.667	11	3	26.35802469	0	0	1	0	1	0	0	25	180	85.4	Male	0
0.768	9	3	18.68512111	0	1	0	1	0	1	3	60	170	54	Male	1
0.736	11	3	19.56295526	2	0	0	0	1	0	0	20	155	47	Female	0
0.786	8	3	23.58832922	0	0	0	0	0	0	2	56	166	65	Female	0
0.768	11	3	23.67125363	0	0	0	1	0	1	1	56	178	75	Male	0
0.705	11	3	20.12855831	1	0	0	0	0	0	2	57	165	54.8	Male	1
0.705	8	3	21.56454491	1	0	0	0	1	0	0	37	164	58	Female	0
0.768	10	3	26.03749399	0	0	1	1	0	0	0	45	158	65	Female	0
0.768	11	3	24.63495476	1	0	0	0	1	1	0	44	183	82.5	Male	1
1	10	3	31.28880697	0	0	2	1	0	0	0	42	160.3	80.4	Female	0
0.786	10	3	25.0995016	2	0	1	0	0	0	0	49	167	70	Female	0
0.705	10	3	24.8357635	2	0	0	1	1	0	0	37	158	62	Female	0
1	11	3	22.49134948	2	1	0	0	0	0	0	23	170	65	Male	0
0.768	10	3	23.11111111	1	0	0	0	0	0	0	63	150	52	Female	1
1	11	3	23.38435374	0	1	0	0	1	1	1	39	168	66	Male	1
1	8	3	21.70792339	2	0	0	0	1	1	0	49	169	62	Male	0
1	11	3	27.73229978	2	0	1	1	0	1	0	34	173	83	Male	0
0.768	10	3	22.89281998	0	0	0	1	0	0	0	51	155	55	Female	1
0.705	10	3	20.2812331	2	0	0	1	1	0	0	64	172	60	Male	0
0.537	9	3	23.52941177	2	0	0	0	0	0	0	38	170	68	Male	1
0.693	9	3	26.64359862	0	1	1	1	1	0	1	54	170	77	Male	0
0.592	11	3	26.76977989	0	0	1	0	0	0	0	41	164	72	Female	0
0.705	11	3	19.43301326	2	0	0	0	0	0	0	46	162	51	Male	1
1	8	3	18.42653421	2	0	0	0	0	0	0	47	158	46	Female	0
1	11	3	19.69266529	0	1	0	0	1	0	0	32	176	61	Male	0
1	8	3	22.22222222	0	0	0	1	0	0	0	42	150	50	Female	1
0.705	8	3	19.57168128	2	0	0	1	0	0	0	42	163	52	Female	1
1	8	3	21.95247934	0	0	0	1	1	0	1	50	176	68	Male	1
0.705	8	3	24.7939537	2	0	0	1	0	0	1	63	171	72.5	Male	1
0.768	8	3	19.43418552	0	0	0	0	0	1	0	27	167	54.2	Male	1
1	10	3	19.81784449	0	0	0	0	1	0	0	46	154	47	Female	0
0.705	9	3	21.28027682	2	0	0	0	1	0	1	44	170	61.5	Male	0
0.705	11	3	17.99992829	2	1	0	1	1	0	0	51	167	50.2	Female	0
0.656	9	3	18.13121943	1	0	0	0	0	0	1	27	154	43	Female	0
0.786	9	3	15.24157903	2	0	0	0	1	1	0	42	162	40	Female	0
1	10	3	20.02884153	0	0	0	0	1	1	0	34	158	50	Female	1
0.768	8	3	21.3577956	0	0	0	1	1	0	1	62	169	61	Male	0
0.581	8	3	23.54570637	2	0	0	1	0	0	3	51	152	54.4	Female	0
0.587	8	3	19.25702882	1	0	0	1	1	0	0	45	169	55	Female	0
0.768	11	3	21.4532872	1	0	0	0	1	0	1	35	170	62	Male	0
0.768	11	3	22.49134948	0	1	0	1	1	0	0	31	170	65	Female	0
1	11	3	23.72904273	2	0	0	0	0	0	2	63	172	70.2	Male	1
0.768	9	3	20.0617284	0	0	0	1	0	1	0	56	180	65	Male	1
1	10	3	22.64737696	1	0	0	0	0	1	1	40	172	67	Male	0
0.768	8	3	19.22337563	0	0	0	0	0	1	0	38	153	45	Female	1
0.768	8	3	23.38868656	0	0	0	1	1	1	0	38	173	70	Male	1
0.705	8	3	24.77961493	2	0	0	0	1	1	0	55	151	56.5	Female	1
0.786	8	3	21.35991456	0	0	0	1	1	0	0	37	159	54	Female	1
0.774	8	3	29.08093279	1	0	1	1	0	0	3	55	135	53	Female	1
0.705	10	3	23.73866213	2	0	0	0	1	1	3	28	168	67	Male	1
1	10	3	22.46003435	2	0	0	1	0	1	0	29	174	68	Male	1
0.768	8	3	20.54988662	0	0	0	0	0	0	0	53	168	58	Male	0
1	11	3	21.2244898	0	0	0	0	1	1	0	39	175	65	Male	0
0.705	10	3	27.18785267	2	0	1	0	0	0	2	55	171	79.5	Male	0
0.705	9	3	20.66115703	2	0	0	1	1	0	1	51	154	49	Female	1
1	9	3	19.9099723	1	1	0	0	1	0	0	61	152	46	Female	0
1	10	3	19.38214469	1	1	0	1	0	1	2	34	159	49	Female	0
0.768	9	3	25.3633218	0	1	1	1	1	0	0	63	170	73.3	Male	0
0.768	10	3	23.78121284	0	0	0	1	1	1	0	54	174	72	Male	0
0.705	11	3	17.22480372	2	0	0	0	1	1	0	49	158	43	Female	0
1	8	3	25.43268596	0	0	1	1	0	1	0	38	174	77	Male	1
1	10	3	24.23822715	0	0	0	1	0	0	0	43	152	56	Female	0
0.768	9	3	21.94425208	0	0	0	1	1	0	0	52	152	50.7	Female	0
1	8	3	16.04938272	1	0	0	1	1	1	0	35	180	52	Male	1
0.768	9	3	22.83737024	1	0	0	0	1	0	1	50	170	66	Female	1
0.661	8	3	30.09143166	0	1	2	0	0	0	0	31	161	78	Male	0
0.768	8	3	27.17391304	0	0	1	1	0	1	3	46	184	92	Male	1
0.786	10	3	23.30905307	2	0	0	1	1	0	3	56	155	56	Female	0
0.768	8	3	22.55861022	0	1	0	0	0	0	0	50	154	53.5	Female	0
1	11	3	24.22399679	2	0	0	1	0	0	7	63	173	72.5	Male	0
0.705	11	3	25.34435262	0	0	1	0	1	1	3	26	165	69	Female	0
0.768	8	3	27.70083103	0	0	1	0	1	1	0	34	171	81	Male	0
0.705	10	3	27.76709813	2	0	1	1	0	0	0	60	153	65	Female	0
1	10	3	25.24933721	0	1	1	1	1	1	2	54	178	80	Male	0
0.768	11	3	20.23950076	0	0	0	0	1	0	1	58	154	48	Female	1
0.786	11	3	21.60410478	2	1	0	0	0	1	0	58	161	56	Female	1
0.768	8	3	18.36547291	0	0	0	1	0	0	1	39	165	50	Female	0
0.649	8	3	25.15315023	0	0	1	0	0	0	1	28	157	62	Female	1
0.768	9	3	21.79930796	0	1	0	0	1	0	3	30	170	63	Male	1
1	9	3	19.10009183	1	1	0	1	0	0	0	26	165	52	Male	1
0.774	10	3	20.71569381	1	1	0	0	0	0	0	38	173	62	Male	1
0.768	9	3	24.38271605	2	1	0	0	1	1	0	48	180	79	Male	0
0.768	10	3	19.31295201	1	0	0	1	0	0	0	58	156	47	Female	0
0.705	11	3	25	2	0	1	1	1	1	1	40	180	81	Male	0
0.786	9	3	27.06405159	2	0	1	1	0	1	1	39	173	81	Male	1
1	11	3	23.78121284	0	0	0	1	0	1	0	39	174	72	Male	0
1	8	3	26.00623583	0	0	1	1	1	1	2	41	168	73.4	Male	0
0.705	11	3	19.28937927	1	0	0	0	0	0	0	52	161	50	Female	0
0.742	10	3	17.7999288	1	0	0	0	0	0	0	26	159	45	Female	0
0.768	9	3	21.62162162	1	0	0	0	0	1	1	43	185	74	Male	1
0.768	10	3	23.30905307	0	1	0	0	1	0	0	62	155	56	Female	0
0.705	9	3	23.38868656	1	0	0	1	0	0	0	53	173	70	Male	0
0.768	11	3	19.57168128	0	0	0	0	1	0	0	51	163	52	Female	1
1	9	3	16.63353483	0	0	0	0	1	1	1	53	157	41	Female	1
0.768	10	3	22.75830678	0	1	0	0	0	0	1	56	169	65	Male	0
0.705	11	3	20.19509221	2	0	0	1	0	0	0	42	162	53	Female	0
1	9	3	18.21368694	0	1	0	1	0	0	0	44	162	47.8	Female	0
0.705	9	3	21.93634741	2	0	0	1	0	0	0	28	164	59	Female	0
0.705	10	3	22.28373053	0	0	0	0	0	0	2	63	146	47.5	Female	0
1	8	3	39.24646782	0	1	2	1	1	1	0	39	182	130	Male	1
1	8	3	19.65903248	0	0	0	0	0	0	1	22	159	49.7	Female	0
0.786	10	3	20.57142857	0	0	0	1	0	1	1	60	175	63	Male	0
0.705	8	3	26.99829932	1	0	1	1	1	0	7	64	168	76.2	Male	0
0.768	11	3	26.27728508	0	0	1	1	1	1	0	43	183	88	Male	0
0.705	10	3	28.30599507	1	0	1	1	1	1	0	43	166	78	Male	0
0.596	8	3	33.7219936	0	0	2	0	1	0	5	62	162	88.5	Male	0
0.786	11	3	26.171875	1	0	1	1	0	0	0	28	160	67	Female	1
1	11	3	24.09297052	1	0	0	1	1	1	0	32	168	68	Male	1
0.768	10	3	24.22145329	1	0	0	0	0	1	0	39	170	70	Male	0
0.768	11	3	21.70105515	0	0	0	1	0	0	1	42	153	50.8	Female	0
1	8	3	17.96875	0	0	0	1	0	1	0	28	160	46	Female	1
0.768	11	3	24.79338843	0	0	0	1	0	1	0	53	165	67.5	Male	0
0.705	8	3	28.07504294	0	0	1	1	1	1	1	50	174	85	Male	0
0.705	9	3	25.71166208	0	0	1	1	1	0	1	38	165	70	Female	0
0.768	8	3	27.45001926	0	0	1	1	0	1	3	48	169	78.4	Male	0
0.705	8	3	21.71126422	2	0	0	0	1	1	1	25	158	54.2	Female	0
1	10	3	22.30935641	0	0	0	1	0	1	0	58	172	66	Male	0
0.705	11	3	22.18934911	2	0	0	0	1	0	0	36	156	54	Female	1
0.768	8	3	22.2136785	0	0	0	1	1	0	4	63	153	52	Female	0
0.768	9	3	23.30905307	0	0	0	1	1	0	1	57	155	56	Female	0
1	8	3	21.77843524	0	0	0	0	1	1	2	27	156	53	Female	0
0.786	9	3	28.07504294	2	0	1	1	0	0	0	43	174	85	Male	0
0.768	11	3	25.03991871	0	0	1	1	0	0	0	62	166	69	Male	1
0.768	9	3	18.28677973	0	1	0	0	0	0	3	43	167	51	Female	0
0.536	8	3	18.80920625	2	0	0	1	0	0	4	54	171	55	Male	0
0.768	11	3	21.96459242	1	0	0	1	0	1	3	50	174	66.5	Male	0
1	9	3	19.31295201	0	1	0	0	1	0	0	32	156	47	Female	0
1	9	3	19.48696145	0	1	0	0	0	1	0	29	168	55	Male	1
1	11	3	27.16262976	0	0	1	1	1	0	3	61	170	78.5	Male	0
0.693	11	3	34.64311351	1	0	2	1	1	1	1	64	179	111	Male	0
0.768	11	3	36.33240851	0	1	2	1	0	1	1	54	174	110	Male	0
1	9	3	16.47764629	0	0	0	1	1	1	0	25	156	40.1	Female	1
1	10	3	22.89281998	0	0	0	1	1	0	1	54	155	55	Female	0
1	8	3	21.29529475	0	0	0	1	0	0	0	47	172	63	Male	1
0.705	9	3	17.14677641	2	0	0	0	1	0	0	50	162	45	Female	1
0.768	10	3	23.55512842	2	0	0	1	0	1	2	52	159.6	60	Female	0
1	8	3	24.6097337	1	0	0	0	1	0	1	57	165	67	Male	1
0.705	11	3	20.98765432	2	0	0	1	0	1	1	48	180	68	Male	1
1	11	3	25.30864198	2	0	1	1	1	1	4	38	180	82	Male	1
0.649	10	3	28.37370242	0	0	1	1	1	0	4	60	170	82	Male	0
1	10	3	23.51020408	2	0	0	1	1	0	2	50	175	72	Male	0
0.768	10	3	27.23922448	0	0	1	1	1	1	2	39	158	68	Female	1
0.724	9	3	22.64086463	0	0	0	0	0	0	4	47	153	53	Female	0
0.631	11	3	24.08822312	0	1	0	1	1	0	1	64	163	64	Male	1
1	10	3	32.60588843	0	1	2	1	1	0	3	52	176	101	Male	1
0.649	11	3	28.56273661	0	0	1	1	0	0	4	64	172	84.5	Male	0
0.649	8	3	27.63980131	0	0	1	0	1	0	4	52	158	69	Male	0
1	9	3	24.48565201	0	1	0	1	0	1	3	48	183	82	Male	0
1	9	3	19.59645812	2	0	0	1	1	1	0	35	166	54	Female	0
0.768	10	3	25.63265306	2	0	1	1	0	0	3	64	175	78.5	Male	0
0.768	11	3	19.99912285	1	0	0	1	0	0	3	55	151	45.6	Female	0
0.705	11	3	17.578125	0	0	0	1	0	0	0	48	160	45	Female	0
0.736	10	3	23.66143862	2	1	0	0	1	1	1	26	172	70	Male	0
0.768	8	3	23.4375	0	1	0	1	0	1	2	59	160	60	Male	0
0.768	9	3	20.28479857	0	0	0	0	0	1	2	56	157	50	Female	0
1	9	3	24.72518293	2	0	0	0	1	0	2	54	173	74	Male	0
0.705	10	3	45.34369761	0	0	2	0	1	1	1	38	162	119	Male	0
0.705	8	3	23.53036634	2	0	0	0	1	0	0	48	157	58	Female	0
0.768	11	3	18.02595738	2	0	0	1	0	0	0	47	158	45	Female	1
0.768	10	3	22.34778209	0	0	0	0	0	1	2	51	154	53	Female	0
1	8	3	28.6801111	0	1	1	1	0	1	4	54	182	95	Male	0
1	9	3	28.99930748	1	1	1	1	1	0	2	62	152	67	Female	0
1	11	3	25.33333333	1	0	1	1	0	0	1	53	150	57	Female	0
0.768	9	3	24.99901112	0	0	0	0	0	0	4	50	159	63.2	Female	0
0.768	8	3	22.48132907	0	1	0	1	0	0	2	46	162	59	Female	0
1	8	3	22.65625	1	0	0	0	1	0	1	45	160	58	Female	0
0.693	8	3	23.14814815	0	1	0	1	1	0	3	60	180	75	Male	1
1	9	3	23.59700421	0	0	0	1	0	0	1	50	171	69	Male	0
0.649	11	3	23.8330046	0	0	0	0	0	0	9	60	156	58	Female	0
1	9	3	28.37370242	0	0	1	0	0	1	1	47	170	82	Male	0
0.768	11	3	22.0603538	2	0	0	0	0	0	0	45	155	53	Male	0
0.724	10	3	26.67487432	0	0	1	1	1	1	3	54	171	78	Male	1
0.705	8	3	23.33546615	2	0	0	0	0	0	2	32	163	62	Female	0
0.58	8	3	21.64412071	0	1	0	1	0	0	1	49	155	52	Female	0
0.705	10	3	23.14049587	2	1	0	0	0	0	3	55	165	63	Female	0
0.705	9	3	25.2825699	1	1	1	1	0	1	0	54	164	68	Male	1
0.786	8	3	19.53125	1	1	0	1	0	0	0	51	160	50	Female	0
0.768	11	3	24.6875	0	1	0	1	1	0	0	27	160	63.2	Female	0
1	9	3	37.03703704	2	0	2	0	1	1	0	29	180	120	Male	0
0.768	8	3	30.48315806	0	0	2	1	0	0	1	50	162	80	Female	1
0.693	11	3	19.4093583	1	0	0	0	1	1	0	31	183	65	Male	1
0.768	9	3	22.64737696	0	0	0	1	1	1	0	47	172	67	Male	0
0.693	9	3	21.98389218	0	0	0	1	1	0	1	56	156	53.5	Female	0
0.656	11	3	17.52781588	2	0	0	0	0	0	0	24	162	46	Female	0
0.768	8	3	27.10204082	0	0	1	1	0	1	2	51	175	83	Male	0
1	9	3	32.24206349	0	0	2	1	0	1	0	44	168	91	Male	0
0.654	11	3	21.79944511	0	0	0	1	1	1	0	52	174	66	Male	0
0.768	10	3	21.23057202	1	0	0	1	0	0	4	33	158	53	Female	0
0.592	11	3	19.97918835	1	0	0	1	1	0	0	51	155	48	Female	0
0.676	9	3	22.33379501	1	0	0	1	1	0	3	50	152	51.6	Female	0
1	8	3	23.62028791	0	0	0	1	1	1	0	47	177	74	Male	1
0.768	10	3	21.35991456	0	0	0	1	0	1	0	52	159	54	Female	0
0.711	9	3	24.50894577	1	0	0	1	0	0	0	44	169	70	Female	0
0.612	8	3	22.22906193	2	1	0	0	1	0	2	39	171	65	Male	1
0.657	11	3	23.87511478	2	1	0	1	1	1	1	32	165	65	Male	1
1	9	3	21.36752137	0	0	0	0	1	1	0	47	156	52	Female	0
1	8	3	25.95155709	0	0	1	1	1	0	1	58	170	75	Male	0
0.768	8	3	24.32653061	0	0	0	1	0	1	0	51	175	74.5	Male	0
1	8	3	20.76124568	1	0	0	1	1	1	1	38	170	60	Male	0
1	10	3	22.09317005	1	0	0	0	1	1	1	41	178	70	Male	1
0.768	8	3	20.41522491	0	1	0	1	1	1	1	40	170	59	Male	0
0.768	10	3	19.31295201	0	0	0	0	0	0	0	44	156	47	Female	1
0.661	11	3	20.81165453	1	0	0	0	0	0	1	47	155	50	Female	0
0.736	8	3	24.48979592	2	1	0	0	0	1	1	28	175	75	Male	0
0.1	9	3	19.53125	2	0	0	0	1	0	1	59	176	60.5	Male	0
1	11	3	28.65075614	2	0	1	1	1	0	1	55	184	97	Male	1
1	11	3	20.02884153	0	0	0	1	1	0	0	30	158	50	Female	0
0.631	8	3	24.74093729	2	0	0	0	0	0	0	42	167	69	Female	1
1	11	3	23.22543185	0	0	0	1	1	0	0	34	166	64	Female	0
1	8	3	24.03460984	0	0	0	1	0	0	0	51	158	60	Female	0
0.705	10	3	21.36752137	1	1	0	0	1	1	0	27	156	52	Female	0
1	9	3	18.06616734	2	0	0	0	1	0	3	54	163	48	Female	1
0.705	9	3	18.66201469	2	0	0	0	1	0	0	45	157	46	Female	0
0.768	8	3	21.95247934	1	1	0	1	0	0	0	43	176	68	Male	1
0.768	10	3	21.06674327	0	0	0	1	1	1	3	45	177	66	Male	0
0.768	9	3	26.56434475	0	0	1	1	1	0	1	50	154	63	Female	0
1	9	3	26.02758248	1	0	1	0	0	0	2	60	172	77	Male	0
0.705	11	3	20.97117202	1	0	0	1	0	0	0	38	184	71	Male	0
1	10	3	26.5625	0	0	1	0	0	1	1	55	160	68	Male	1
0.705	9	3	21.0076678	1	1	0	1	0	0	2	58	169	60	Male	0
1	11	3	19.74843775	0	0	0	0	1	1	0	46	158	49.3	Male	0
0.768	9	3	19.8791026	1	0	0	1	1	0	0	55	157	49	Female	0
0.768	11	3	22.5710475	0	1	0	1	0	1	1	50	171	66	Male	1
1	11	3	26.29848784	0	0	1	1	0	0	2	63	156	64	Female	1
1	10	3	21.08281329	1	0	0	0	0	1	3	63	154	50	Female	1
0.768	11	3	23.01117686	0	0	0	1	1	0	0	33	156	56	Female	1
0.768	11	3	27.02379886	1	0	1	1	1	1	1	55	183	90.5	Male	0
0.587	11	3	29.06574395	1	0	1	0	0	0	1	60	170	84	Male	1
0.768	9	3	28.04037815	0	1	1	1	0	1	4	52	158	70	Female	0
0.768	8	3	24.27480369	0	0	0	1	0	1	1	40	167	67.7	Male	0
0.768	11	3	19.43696869	1	1	0	1	0	0	3	62	153	45.5	Female	0
0.705	10	3	38.15512347	2	0	2	1	0	1	6	33	181	125	Male	1
0.705	8	3	20.44674202	0	0	0	1	1	0	0	47	161	53	Female	0
1	11	3	25.68735828	0	0	1	0	1	0	0	34	168	72.5	Female	0
0.768	10	3	22.58955144	2	0	0	1	1	0	3	64	167	63	Male	0
0.705	8	3	20.22912995	1	0	0	0	1	0	1	49	158	50.5	Female	1
0.768	10	3	23.21799308	0	0	0	1	0	0	6	46	170	67.1	Male	0
0.786	10	3	27.2	2	0	1	1	0	0	0	39	150	61.2	Female	1
0.705	9	3	20.82999519	2	0	0	0	1	1	1	36	158	52	Female	0
0.724	9	3	22.5308642	2	0	0	1	1	1	2	57	180	73	Male	0
0.768	11	3	23.71184463	0	0	0	1	0	0	0	42	163	63	Female	0
1	10	3	25.30864198	0	1	1	1	1	1	1	44	180	82	Male	0
0.768	9	3	17.31301939	0	0	0	0	1	0	0	48	152	40	Female	0
0.768	9	3	23.6177071	0	1	0	0	1	0	0	20	167.8	66.5	Male	0
0.768	9	3	21.30394858	0	0	0	1	0	1	0	43	165	58	Male	1
0.536	8	3	19.28937927	0	0	0	0	0	0	2	51	161	50	Female	0
0.661	8	3	21.63331531	1	1	0	0	0	0	2	22	172	64	Male	1
1	10	3	23.23345618	0	0	0	1	0	0	2	37	158	58	Female	0
1	11	3	20.24489796	0	0	0	1	0	1	1	47	175	62	Male	1
0.768	11	3	27.18785267	0	1	1	0	1	1	2	47	171	79.5	Male	0
0.705	9	3	22.78726319	0	1	0	1	0	0	0	57	173	68.2	Female	1
0.705	9	3	28.60476495	0	1	1	1	1	0	0	57	163	76	Female	0
0.705	11	3	21.99762188	1	1	0	1	1	0	0	58	174	66.6	Male	0
0.654	9	3	24.85907356	0	0	0	0	1	1	0	37	169	71	Male	0
0.705	9	3	25.33333333	0	1	1	1	0	0	0	52	150	57	Female	0
1	9	3	21.09375	0	1	0	0	1	1	2	59	160	54	Female	0
0.768	10	3	23.3241506	0	0	0	1	1	0	1	42	165	63.5	Female	0
0.768	9	3	19.94805977	0	0	0	1	0	0	1	47	163	53	Female	1
1	11	3	20.04744562	2	0	0	1	0	0	1	58	173	60	Male	1
0.474	9	3	17.92821543	1	0	0	0	0	0	1	44	167	50	Female	0
1	8	3	24.08822312	0	1	0	0	0	0	1	38	163	64	Male	0
1	9	3	29.64951156	0	0	1	0	0	1	4	43	179	95	Male	0
0.786	9	3	23.93606232	1	0	0	1	0	0	0	46	157	59	Female	0
0.768	11	3	23.14725512	0	0	0	0	0	1	5	63	161	60	Male	0
0.705	9	3	19.53125	1	0	0	1	0	0	2	48	160	50	Male	1
0.587	10	3	23.78712033	1	0	0	1	1	0	3	60	163	63.2	Male	1
0.649	11	3	24.27012472	0	0	0	1	0	1	3	64	168	68.5	Male	1
1	8	3	22.49134948	1	0	0	0	0	0	0	24	170	65	Male	1
0.768	10	3	22.55247557	0	1	0	0	0	0	1	50	158	56.3	Female	0
0.768	9	3	18.87066338	0	1	0	1	0	0	1	50	166	52	Female	0
1	11	3	25.390625	1	0	1	1	1	1	1	56	160	65	Male	0
0.768	10	3	18.507766	0	0	0	0	1	0	0	56	166	51	Female	0
0.768	10	3	21.95161032	1	0	0	1	0	0	0	49	158	54.8	Female	0
0.705	8	3	19.72386588	2	1	0	1	0	0	0	50	156	48	Female	0
0.768	8	3	22.09317005	2	0	0	0	1	1	0	34	178	70	Male	0
0.592	9	3	24.28097534	0	1	0	1	0	0	1	50	171	71	Male	0
0.649	10	3	31.64556962	1	0	2	0	1	0	3	61	158	79	Female	0
0.587	9	3	22.49134948	1	0	0	0	1	1	0	39	170	65	Male	0
0.768	8	3	24.14151925	0	0	0	1	1	0	1	56	155	58	Female	0
0.705	9	3	19.06570152	0	0	0	1	0	0	1	47	159	48.2	Female	0
0.768	8	3	22.66666667	0	0	0	0	0	1	0	60	150	51	Female	0
0.768	8	3	23.4375	0	0	0	0	1	1	5	49	160	60	Female	0
0.768	10	3	21.63114885	1	1	0	1	1	0	1	53	158	54	Female	0
0.768	10	3	21.79930796	0	0	0	1	1	1	0	60	170	63	Male	0
1	8	3	21.75546853	0	0	0	0	0	0	3	43	159	55	Female	0
0.768	9	3	31.64556962	0	0	2	1	1	0	1	52	158	79	Female	0
0.705	10	3	20.56932966	0	1	0	1	0	0	1	64	165	56	Female	0
0.768	10	3	20.79672989	1	0	0	1	1	0	1	37	167	58	Female	0
0.768	8	3	32.11195241	0	0	2	1	0	0	0	49	172	95	Female	0
0.693	9	3	21.64127424	0	0	0	1	1	0	1	50	152	50	Female	0
0.768	10	3	21.12029385	0	1	0	1	0	0	1	48	165	57.5	Female	1
0.768	11	3	25.84776822	0	0	1	1	1	0	0	38	161	67	Female	0
1	10	3	19.13682277	1	0	0	1	0	1	1	39	165	52.1	Female	1
0.768	10	3	22.69124059	0	0	0	1	1	0	0	60	174	68.7	Male	0
0.587	10	3	24.14151925	1	0	0	1	0	0	2	59	155	58	Female	0
1	9	3	20.76124568	0	0	0	0	1	1	1	38	170	60	Female	0
1	9	3	26.48962875	0	0	1	1	0	0	2	63	174	80.2	Male	0
0.693	10	3	39.2565294	0	0	2	0	1	1	1	46	158	98	Female	0
1	10	3	20.82093992	1	0	0	1	0	0	3	53	164	56	Female	0
0.768	10	3	28.89273356	0	0	1	0	0	1	3	58	170	83.5	Male	0
0.768	11	3	31.48788927	0	0	2	0	1	0	3	51	170	91	Male	1
1	10	3	27.45060487	0	1	1	1	0	0	1	49	177	86	Male	1
0.533	10	3	21.5450908	2	0	0	0	0	0	2	62	171	63	Male	1
0.536	8	3	22.14427438	0	0	0	0	0	0	3	63	168	62.5	Female	0
1	11	3	20.54569362	1	1	0	0	0	0	1	60	156	50	Female	0
0.693	9	3	18.68921469	0	0	0	0	1	0	0	41	166	51.5	Female	0
0.693	10	3	23.55555556	0	1	0	1	0	0	4	59	150	53	Female	0
0.654	9	3	18.92915089	1	0	0	1	1	1	0	53	172	56	Male	1
0.705	10	3	20.19557823	0	0	0	1	0	0	0	44	168	57	Female	0
0.768	8	3	25.68956193	0	0	1	1	1	1	1	52	172	76	Male	0
0.649	10	3	18.25631872	0	0	0	0	0	1	0	56	157	45	Female	0
0.587	10	3	20.07774788	2	0	0	0	0	1	1	48	153	47	Female	1
0.768	8	3	20.95717116	0	0	0	1	1	0	1	48	162	55	Female	1
0.705	8	3	29.38475666	1	0	1	1	0	1	2	57	165	80	Male	1
0.649	8	3	24.30461788	1	1	0	1	0	0	0	25	161	63	Female	0
0.768	11	3	24.64899688	1	0	0	1	0	0	0	60	169	70.4	Male	0
0.705	11	3	22.49858277	0	0	0	1	1	1	3	27	168	63.5	Male	1
0.768	9	3	23.51020408	0	1	0	1	1	0	4	63	175	72	Male	0
1	10	3	24.8015873	0	0	0	1	0	0	1	51	168	70	Male	1
0.473	8	3	29.58579882	0	0	1	1	1	0	1	42	156	72	Female	1
0.786	10	3	17.4817898	2	1	0	1	0	0	0	53	155	42	Female	1
1	8	3	22.53061225	0	0	0	1	0	1	0	54	175	69	Male	1
1	8	3	25.59783327	0	0	1	0	1	0	2	60	174	77.5	Male	1
0.768	8	3	20.77562327	0	0	0	1	1	0	0	49	152	48	Female	0
0.592	9	3	17.087445	2	1	0	0	0	0	0	25	153	40	Female	1
0.28	9	3	32.76221743	1	0	2	0	0	0	7	52	171	95.8	Male	0
0.768	11	3	30.11621315	0	0	2	1	1	1	5	49	168	85	Male	0
0.768	8	3	23.828125	2	0	0	0	0	0	1	62	160	61	Male	0
0.649	8	3	24.86395196	0	0	0	0	0	0	1	55	146	53	Female	1
0.705	9	3	23.43374459	2	0	0	0	0	0	0	50	158	58.5	Female	0
0.587	11	3	18.359375	0	0	0	1	1	1	3	46	160	47	Female	1
0.612	9	3	24.09297052	2	0	0	0	0	0	2	45	168	68	Male	1
0.768	8	3	19.37716263	1	0	0	1	1	0	1	60	170	56	Male	1
0.587	11	3	27.77670615	0	0	1	1	1	0	2	56	161	72	Female	0
0.768	10	3	25.03633241	0	0	1	0	1	1	0	63	174	75.8	Male	1
0.768	9	3	20.83252961	0	0	0	1	0	0	0	49	161	54	Female	0
0.67	9	3	32.46618106	1	1	2	1	0	0	6	48	155	78	Female	0
1	11	3	17.36044134	0	0	0	1	0	0	0	52	161	45	Female	0
0.768	11	3	28.88888889	1	0	1	0	0	0	2	21	150	65	Female	0
0.497	9	3	18.73048907	1	0	0	0	0	0	0	51	155	45	Female	1
0.768	10	3	17.90885536	0	0	0	1	1	1	3	45	162	47	Female	0
1	10	3	21.875	0	0	0	1	1	1	1	64	160	56	Female	0
0.768	10	3	30.99173554	0	1	2	0	1	1	3	40	176	96	Male	1
0.786	9	3	18.16620425	2	0	0	0	1	0	3	44	174	55	Male	0
1	9	3	29.06829946	0	1	1	1	0	1	2	45	178	92.1	Male	0
1	9	3	27.39091856	0	0	1	1	0	1	0	53	161	71	Male	1
0.768	9	3	26.47210744	1	0	1	1	0	0	4	56	176	82	Male	0
0.506	10	3	32.03895938	0	0	2	1	1	1	0	48	153	75	Female	0
0.548	9	3	19.69266529	1	1	0	1	1	1	0	43	176	61	Male	0
0.631	10	3	18.359375	0	0	0	0	0	0	2	21	160	47	Female	1
0.768	9	3	19.53125	0	1	0	1	1	0	0	49	160	50	Female	0
1	10	3	21.86851211	2	0	0	0	0	1	2	38	170	63.2	Male	0
0.596	10	3	23.38435374	1	0	0	1	1	1	1	51	168	66	Male	0
0.768	9	3	21.98989237	0	0	0	1	1	0	5	59	161	57	Male	0
0.649	8	3	33.13975508	0	0	2	0	0	1	2	60	178	105	Male	1
0.724	9	3	27.5390625	0	1	1	1	0	0	5	61	160	70.5	Male	0
0.649	11	3	27.40765728	0	0	1	1	0	0	2	64	154	65	Female	0
0.587	8	3	27.4395129	1	0	1	1	0	0	4	63	158	68.5	Female	0
0.536	11	3	31.63371488	0	0	2	1	0	0	2	61	155	76	Female	0
0.494	8	3	29.76083761	0	0	1	0	0	0	2	46	167	83	Male	1
0.768	8	3	22.54657648	1	0	0	1	0	0	0	43	159	57	Female	0
0.705	11	3	21.64412071	2	0	0	1	0	0	1	38	155	52	Female	0
1	10	3	19.22337563	0	0	0	1	1	1	2	34	153	45	Female	0
0.768	9	3	23.37472608	1	1	0	1	1	1	1	46	185	80	Male	1
0.587	9	3	31.1634349	1	0	2	0	0	0	2	62	152	72	Female	1
0.587	9	3	26.79493802	1	0	1	1	1	1	2	57	176	83	Male	1
0.768	8	3	26.89232314	1	0	1	1	1	1	1	63	167	75	Male	1
0.526	8	3	41.40163348	0	0	2	1	1	0	1	54	163	110	Female	0
0.419	10	3	27.10204082	2	0	1	1	0	0	5	41	175	83	Male	1
0.631	8	3	27.49100115	2	0	1	1	0	0	1	64	159	69.5	Female	1
0.592	9	3	22.58955144	1	0	0	1	1	1	0	45	167	63	Male	1
1	10	3	27.33564014	0	0	1	1	1	0	0	63	170	79	Male	0
0.768	9	3	22.09317005	2	0	0	1	0	1	0	47	178	70	Male	1
0.419	10	3	37.98388162	0	0	2	1	0	0	3	60	174	115	Male	0
0.724	11	3	21.79930796	0	0	0	0	1	1	0	24	170	63	Male	1
0.587	10	3	24.52434635	1	0	0	1	1	0	4	61	159	62	Male	0
0.768	8	3	23.77142857	0	0	0	0	0	1	1	29	175	72.8	Male	1
0.768	8	3	33.3984375	2	0	2	0	0	1	1	34	160	85.5	Male	0
0.654	10	3	27.6816609	1	0	1	0	0	0	1	42	170	80	Male	1
0.536	9	3	16.10587865	2	0	0	0	0	0	2	51	169	46	Female	1
0.768	9	3	25.77777778	0	0	1	0	0	1	1	47	150	58	Female	0
0.768	11	3	24.14151925	0	1	0	1	0	0	2	55	155	58	Female	0
0.592	11	3	22.77318641	2	0	0	0	0	0	1	55	165	62	Female	0
0.774	11	3	21.96712018	1	0	0	0	0	1	0	25	168	62	Male	1
0.631	11	3	18.36547291	0	0	0	0	0	1	3	50	165	50	Female	1
0.768	8	3	22.76146754	0	1	0	1	0	0	1	57	161	59	Female	0
0.693	8	3	29.74419988	0	1	1	1	0	0	2	53	164	80	Female	0
1	10	3	26.57312925	0	1	1	0	0	1	4	42	168	75	Male	0
0.705	11	3	16.6015625	0	0	0	1	1	1	2	44	160	42.5	Female	0
0.631	10	3	21.66416488	2	1	0	0	0	0	3	54	157	53.4	Female	1
0.631	10	3	23.87565931	1	0	0	0	0	0	1	48	179	76.5	Male	0
0.649	9	3	19.06771066	0	0	0	1	1	0	5	64	157	47	Male	0
0.705	8	3	23.93948099	2	0	0	1	0	1	0	41	177	75	Male	1
0.533	11	3	19.05211206	2	0	0	0	1	0	1	30	166	52.5	Female	1
1	9	3	26.53375883	0	0	1	0	0	1	4	52	167	74	Female	1
0.736	11	3	17.2879069	2	1	0	1	1	0	2	31	154	41	Female	1
0.768	10	3	22.03172569	0	0	0	1	0	1	0	46	158	55	Female	0
1	9	3	22.40587695	0	0	0	1	0	0	0	46	165	61	Female	0
0.705	8	3	23.87511478	0	0	0	1	1	1	2	30	165	65	Male	1
0.736	8	3	20.34279778	1	0	0	1	0	0	3	29	152	47	Female	0
0.786	11	3	19.37716263	1	0	0	0	0	1	0	33	170	56	Male	1
0.705	11	3	22.85714286	1	1	0	0	1	1	0	35	175	70	Male	0
0.705	10	3	20.81165453	2	0	0	1	1	0	0	38	155	50	Female	1
0.786	11	3	23.7654321	2	0	0	1	1	1	0	46	180	77	Male	0
0.705	11	3	22.69387755	2	0	0	1	1	0	7	39	175	69.5	Male	1
0.332	10	3	22.49134948	1	0	0	0	1	0	0	25	170	65	Male	0
1	8	3	24.15881797	2	1	0	0	1	0	0	30	169	69	Male	1
1	8	3	24.08822312	2	0	0	1	1	0	1	60	163	64	Male	0
1	8	3	22.34351559	2	0	0	1	0	1	2	46	177	70	Male	0
0.786	11	3	26.2345679	2	1	1	0	0	1	4	24	180	85	Male	1
0.786	10	3	20.93212013	1	0	0	1	1	1	1	56	153	49	Female	0
0.768	11	3	21.484375	1	1	0	0	0	0	0	56	160	55	Female	1
0.705	10	3	28.07504294	2	0	1	0	1	1	1	48	174	85	Male	1
0.786	10	3	20.62970678	1	0	0	1	0	0	0	34	158	51.5	Female	0
0.768	8	3	27.63605442	1	0	1	0	0	1	1	54	168	78	Male	0
0.786	11	3	19.31295201	2	0	0	0	0	0	1	30	156	47	Female	1
0.705	9	3	23.50780533	1	0	0	1	0	0	0	37	165	64	Female	0
1	8	3	22.20633069	0	0	0	0	1	1	0	43	163	59	Male	1
0.612	9	3	22.85714286	2	0	0	1	1	0	3	29	175	70	Female	1
0.714	8	3	19.81767737	1	1	0	0	1	1	0	23	174	60	Male	1
1	9	3	20.54988662	1	0	0	0	1	1	0	27	168	58	Male	1
0.661	9	3	24.48979592	0	0	0	0	0	0	0	34	175	75	Male	0
0.517	9	3	27.4691358	0	0	1	1	1	1	0	45	180	89	Male	1
0.667	10	3	20.2812331	1	0	0	1	1	1	0	24	172	60	Male	0
0.786	8	3	19.25261962	2	0	0	1	1	1	0	27	178	61	Male	1
0.705	10	3	19.91836735	2	0	0	0	1	0	0	39	175	61	Male	1
0.742	9	3	16.86625063	2	1	0	0	1	0	3	28	154	40	Female	0
0.786	10	3	20.61744774	1	0	0	1	1	1	2	44	167	57.5	Male	0
0.693	9	3	29.06879615	0	0	1	1	0	0	3	63	173	87	Male	0
0.786	9	3	20.06920415	2	0	0	1	1	1	2	31	170	58	Male	0
0.705	11	3	26.03749399	2	0	1	1	0	1	0	41	158	65	Female	0
0.786	11	3	17.30103806	0	0	0	1	0	1	1	28	170	50	Male	0
0.705	10	3	22.46003435	2	1	0	0	1	1	1	30	174	68	Male	0
0.473	10	3	17.54151492	0	0	0	0	1	1	1	25	173	52.5	Male	0
0.592	8	3	23.38868656	1	0	0	0	0	0	1	58	173	70	Male	0
0.786	10	3	28.73467206	2	0	1	1	0	0	0	39	173	86	Male	0
0.786	11	3	21.93634741	2	0	0	0	0	0	0	35	164	59	Female	1
0.692	11	3	19.62323391	2	0	0	0	1	0	0	32	182	65	Male	0
0.724	8	3	24.1516725	1	0	0	0	0	1	0	43	182	80	Male	0
0.28	11	3	26.6727633	2	0	1	0	1	0	3	56	162	70	Female	1
0.613	10	3	32.37609272	1	0	2	0	0	0	1	28	159	81.85	Female	0
0.649	9	3	19.9099723	0	1	0	1	0	0	0	54	152	46	Female	1
0.705	8	3	22.78330889	2	1	0	1	1	0	0	60	179	73	Male	0
0.631	10	3	23.0400202	1	0	0	1	0	1	0	46	178	73	Male	1
0.656	11	3	27.04164413	2	0	1	0	1	1	0	30	172	80	Male	0
0.612	9	3	18.7471422	2	1	0	1	1	0	3	53	162	49.2	Female	0
0.536	10	3	24.22145329	1	0	0	1	1	0	4	62	170	70	Male	0
0.533	9	3	20.44913742	1	0	0	0	0	0	2	48	164	55	Female	1
0.661	11	3	20.54569362	2	0	0	0	0	0	0	48	156	50	Female	1
0.705	8	3	17.89802289	1	1	0	0	1	0	2	55	155	43	Female	0
0.786	8	3	25.20398138	2	0	1	0	1	0	1	58	153	59	Female	0
0.705	11	3	29.13631634	1	0	1	0	0	1	2	49	155	70	Female	0
0.786	11	3	21.60493827	2	1	0	1	1	1	2	29	180	70	Male	1
0.434	8	3	27.4650005	0	0	1	0	1	0	8	55	173	82.2	Male	1
0.419	9	3	24.96494648	2	0	0	0	0	0	1	54	171	73	Male	0
0.705	11	3	25.25951557	2	0	1	0	1	0	0	39	170	73	Female	1
1	11	3	26.69913281	1	0	1	0	0	0	2	53	153	62.5	Female	1
0.656	8	3	37.6184125	2	0	2	0	1	1	3	48	171	110	Male	0
0.768	9	3	22.51829612	0	0	0	1	1	0	2	46	146	48	Female	0
0.548	11	3	16.94439994	1	1	0	1	1	0	5	60	158	42.3	Female	1
0.58	11	3	19.93617555	1	0	0	1	0	0	8	52	167	55.6	Female	1
0.587	8	3	23.05456246	2	0	0	0	1	1	4	58	173	69	Male	1
0.705	10	3	20.43816559	1	1	0	1	0	0	5	43	167	57	Female	0
0.768	10	3	22.94811575	2	0	0	0	1	1	2	40	167	64	Male	1
0.581	11	3	50.30630046	2	0	2	0	1	0	3	39	157	124	Female	0
0.661	9	3	25.38426526	2	0	1	0	1	0	0	38	169	72.5	Male	0
0.786	10	3	27.41445369	2	0	1	1	1	1	0	57	174	83	Male	0
0.522	11	3	21.55102041	2	1	0	0	0	0	0	29	175	66	Male	1
0.473	11	3	18.14613043	1	0	0	1	1	0	3	52	158	45.3	Female	0
0.705	8	3	18.359375	0	0	0	1	0	0	0	33	160	47	Female	0
0.652	9	3	33.95061728	1	0	2	0	0	0	2	32	180	110	Male	1
1	11	3	24.33388187	0	0	0	0	1	1	0	46	169	69.5	Male	1
0.654	8	3	18.16620425	2	0	0	0	1	1	0	39	174	55	Male	0
0.517	8	3	25.92653061	0	1	1	1	1	0	1	60	175	79.4	Male	0
1	10	3	19.6282647	0	0	0	0	0	0	2	50	158	49	Female	1
0.742	10	3	18.35281227	0	0	0	0	1	1	1	23	148	40.2	Female	0
0.705	11	3	21.2244898	2	0	0	1	1	1	2	39	175	65	Male	1
0.705	8	3	24.22145329	0	0	0	1	0	1	0	37	170	70	Male	1
0.612	10	3	23.82906199	2	0	0	0	0	0	0	48	178	75.5	Male	1
0.705	9	3	23.25501864	2	0	0	1	0	1	1	46	171	68	Male	1
0.67	10	3	19.921875	2	0	0	0	1	0	3	35	160	51	Female	0
0.786	11	3	18.81892431	2	0	0	1	1	1	1	35	163	50	Female	1
0.705	9	3	22.85714286	2	1	0	0	0	1	1	44	175	70	Male	1
0.482	8	3	19.9099723	2	0	0	0	0	0	4	37	152	46	Female	1
0.527	15	4	15.05970096	2	0	0	0	0	0	0	55	167	42	Female	1
0.768	12	4	22.27530992	0	0	0	1	0	1	2	32	176	69	Male	1
0.533	13	4	35.01277967	2	0	2	0	0	0	6	39	169	100	Male	1
0.705	14	4	19.59645812	2	0	0	0	1	1	3	51	166	54	Male	0
0.587	15	4	21.484375	2	1	0	0	0	0	0	38	160	55	Female	1
1	14	4	28.07504294	2	0	1	0	0	0	0	44	174	85	Male	1
0.654	14	4	23.14814815	1	0	0	0	0	0	0	45	180	75	Male	0
0.705	13	4	21.63331531	2	1	0	0	0	1	0	37	172	64	Male	0
[truncated: 1,101 more rows]
